## Local and substrate-specific S-palmitoylation determines subcellular localization of Gao

Gonzalo P. Solis<sup>1\*</sup>, Arghavan Kazemzadeh<sup>1</sup>, Jana Valnohova<sup>1</sup>, Laurence Abrami<sup>2</sup>, Cecilia Alvarez<sup>3</sup>, F. Gisou van der Goot<sup>2</sup> and Vladimir L. Katanaev<sup>1,4\*</sup>

<sup>1</sup>Translational Research Center in Oncohaematology, Department of Cell Physiology and Metabolism, Faculty of Medicine, University of Geneva, 1211 Geneva, Switzerland;

<sup>2</sup>Global Health Institute, School of Life Sciences, EPFL, 1015 Lausanne, Switzerland;

<sup>3</sup>Centro de Investigaciones en Bioquímica Clínica e Inmunología (CIBICI-CONICET). Departamento de Bioquímica Clínica, Facultad de Ciencias Químicas, Universidad Nacional de Córdoba, Córdoba, Argentina;

<sup>4</sup>School of Biomedicine, Far Eastern Federal University, Vladivostok 690090, Russia;

\*Authors for correspondence: [gonzalo.solis@unige.ch](mailto:gonzalo.solis@unige.ch); [vladimir.katanaev@unige.ch](mailto:vladimir.katanaev@unige.ch).

### ABSTRACT

Peripheral membrane proteins (PMPs) associate with cellular membranes through post-translational modifications like S-palmitoylation. The Golgi apparatus is generally viewed as the transitory station where palmitoyl acyltransferases (PATs) modify PMPs, which are then transported to their ultimate destinations such as plasma membrane (PM); little substrate specificity among the many PATs has been determined. Here we describe inherent partitioning of Gao –  $\alpha$ -subunit of heterotrimeric Go-proteins – to PM and Golgi, independent from Golgi-to-PM transport. A minimal code within the Gao N-terminus governs the compartmentalization and re-coding produces G-protein versions with shifted localization. We established the S-palmitoylation at the outer nuclear membrane assay (“SwissKASH”) to

probe substrate specificity of PATs in intact cells. With this assay, we showed that PATs localizing to different membrane compartments display remarkable substrate selectivity, which is the basis for specific PMP compartmentalization. Our findings uncover a novel mechanism governing protein localization and establish the basis for innovative drug discovery.

## INTRODUCTION

G protein-coupled receptors (GPCRs) and their immediate transducers  $\square$  heterotrimeric G proteins  $\square$  have been the subject of intensive scrutiny for decades, primarily due to their pivotal roles in innumerable physiological and pathological processes<sup>1</sup>. Heterotrimeric G proteins are composed of  $G\alpha$ ,  $G\beta$  and  $G\gamma$  subunits. The  $G\alpha$  subunit is loaded with either GDP or GTP; the  $G\beta$  and  $G\gamma$  subunits form a constitutive heterodimer that reversibly binds to  $G\alpha$ . GPCRs directly interact with heterotrimeric G proteins on the cytosolic surface of the membrane. Upon activation, GPCRs act as exchange factors to enhance the release of GDP from  $G\alpha$ , leading to the binding of GTP and activation of the  $G\alpha$  subunit. Subsequently, activated  $G\alpha$  dissociates from the receptor and the  $G\beta\gamma$  heterodimer, and the free subunits are competent to interact with downstream targets<sup>2</sup>.

G protein activation via GPCRs has long been thought to occur exclusively at the plasma membrane (PM). Recently, however, considerable experimental evidence has accumulated supporting the notion that GPCRs can activate  $G\alpha$  subunits on the Golgi and other compartments<sup>3</sup>. Analogously, activation of the KDEL receptor (KDELRL) by cargo from the endoplasmic reticulum (ER) was shown to trigger signal cascades via  $G_{\alpha s}$  and  $G_{\alpha q/11}$ , with KDELRL acting as a non-canonical GPCR at the Golgi<sup>4</sup>. Our own work showed that KDELRL also binds and activates monomeric  $G_{\alpha o}$ , which in turn enhances the Golgi-to-PM trafficking via small Rab GTPases<sup>5</sup>. Therefore, the subcellular compartmentalization of  $G\alpha$  subunits appears to be of fundamental relevance for their functions. How  $G\alpha$  subunit compartmentalization is achieved and controlled, however, remains poorly understood.

$G\alpha$  subunits are grouped into four subfamilies based on sequence and functional similarity:  $G_{\alpha s}$ ,  $G_{\alpha q/11}$ ,  $G_{\alpha 12/13}$  and  $G_{\alpha o/i}$ <sup>2</sup>. All  $G\alpha$  subunits bind to membranes via fatty acid modifications at the N-terminus, i.e. N-myristoylation and S-palmitoylation<sup>6</sup>. While the majority of  $G\alpha$  subunits are single-palmitoylated,  $G_{\alpha o}$  and other members of the  $G_{\alpha o/i}$  subfamily are dual-lipidated. N-myristoylation occurs co-translationally and results in the attachment of a 14-carbon saturated fatty acid (myristate) to the N-terminal Gly via a stable

amide bond<sup>7</sup>. S-palmitoylation occurs post-translationally and results in the attachment of a 16-carbon saturated fatty acid (palmitate) to a Cys residue through a reversible thioester linkage<sup>8</sup>. In vertebrates, N-myristoylation is catalyzed by two closely related N-myristoyltransferases (NMT1 and NMT2) whose substrate specificities have been intensively studied in recent years<sup>9</sup>. Intracellular S-palmitoylation is catalyzed by a zinc-finger Asp-His-His-Cys domain-containing (zDHHC) family of palmitoyl acyltransferases (PATs)<sup>10</sup>. There are up to 24 zDHHCs described in mammals; opposite to NMTs, their substrate specificities are far from being well understood, although substantial advance has been made lately<sup>11</sup>.

Previously, S-palmitoylation of peripheral membrane proteins (PMPs), including Gα subunits, was shown to occur exclusively at the Golgi, with the palmitoylated proteins subsequently transported to the PM<sup>12</sup>. In recent years, however, cumulative data has emerged indicating that some PMPs might undergo local S-palmitoylation on their target compartments, namely the PM or ER<sup>13, 14</sup>. Experimental methods allowing visualization of S-palmitoylation in intact cells are highly demanded to properly address the issue of the site(s) of this crucial lipid modification.

Here, we define the critical parameters that govern Gαo N-myristoylation, S-palmitoylation and subcellular compartmentalization. By engineering a system that allows the ectopic localization of zDHHCs to the outer nuclear membrane, we show an intriguing substrate specificity of several zDHHCs distinguishing among closely related substrates. Moreover, our data indicate that the steady-state localization of Gαo at the PM and Golgi apparatus is the outcome of local S-palmitoylation events. These findings contrast the previous view that i) S-palmitoylation of PMPs occurs exclusively at the Golgi and ii) serves to drive subsequent PM-directed delivery of such proteins. The unexpected selectivity among different PATs and their substrates we uncover to drive the intracellular localization of PMPs emerges as an attractive target for drug discovery.

## RESULTS

### The minimal localization code in the N-terminus of Gao

Early studies using metabolic labeling with [<sup>3</sup>H]myristate and [<sup>3</sup>H]palmitate demonstrated that Gao membrane association is mediated by N-myristoylation at Gly2 and S-palmitoylation at Cys3 in its N-terminus<sup>15-17</sup>. A recent structural analysis identified the recognition sequence of N-myristoyltransferases (NMTs) as an N-terminal hexapeptide, excluding Met<sup>1</sup><sup>18</sup>. This suggest that a minimal membrane-binding information might reside within the first seven residues of Gao. Thus far, three crystal structures of heterotrimeric Go have been solved, showing a prominent  $\alpha$ -helix in the Gao N-terminus that extends toward the G $\beta$  heterodimer. Overlay of the N-termini of the three structures revealed the  $\alpha$ -helixes to start at position 6 to 10 and to end at position 31 (Supplementary Fig. 1a-c). Similarly, overlay of N-termini of seven solved structures of Gai1 □ a close Gao homologue □ showed the  $\alpha$ -helix from the residues 7-8 to position 31 (Supplementary Fig. 1d-f). This analysis suggests that the N-termini of Gao and its homologs contain distinct regions: the unstructured yet harboring lipidations heptapeptide to be followed by the  $\alpha$ -helix. To study if these regions might have specific roles in Gao subcellular localization, we generated the following GFP-fusion constructs (Fig. 1a): one including Gao N-terminal heptapeptide (Gao-Nt<sup>7</sup>-GFP), another with the first 31 residues covering the  $\alpha$ -helix (Gao-Nt<sup>31</sup>-GFP), and a third containing only the  $\alpha$ -helix (Gao-Nt<sup>8-31</sup>-GFP). These constructs were expressed in the mouse neuroblastoma Neuro-2a cells (N2a) and their localization at the plasma membrane (PM) and Golgi apparatus were compared with the full-length Gao-GFP<sup>5</sup>. Surprisingly, Gao-Nt<sup>7</sup>-GFP localized predominantly at the Golgi with weak PM localization remaining, whereas Gao-Nt<sup>31</sup>-GFP displayed a more homogenous PM and Golgi distribution similar to Gao-GFP (Fig. 1b-d). Quantification of average fluorescence intensities at these compartments confirmed a much higher Golgi and a lower PM localization of Gao-Nt<sup>7</sup>-GFP compared to Gao-Nt<sup>31</sup>-GFP and Gao-GFP (Fig. 1e,f), despite similar expression level of the constructs (Supplementary Fig. 1g,h). Then, we performed a crude subcellular fractionation of N2a cells expressing the

constructs and showed that Gao-Nt<sup>7</sup>-GFP, Gao-Nt<sup>31</sup>-GFP and Gao-GFP were similarly partitioned between the cytosolic and membrane fractions (Fig. 1g,h). On the other hand, Gao-Nt<sup>8-31</sup>-GFP was spread over the cytosol and nucleus (Supplementary Fig. 1i), indicating that the N-terminal  $\alpha$ -helix alone is not sufficient for membrane association.

In the heterotrimeric G protein complex, the N-terminal  $\alpha$ -helix of G $\alpha$  is one of the regions binding to G $\beta$ <sup>19</sup>. Since G $\beta$  tightly interacts with G $\gamma$ , which in turn associates to membranes via its C-terminal prenylation<sup>20</sup>, we tested if the poor PM localization of Gao-Nt<sup>7</sup>-GFP relates to a lack of G $\beta\gamma$  interaction. For this aim, we co-expressed the Gao constructs together with mRFP-G $\beta$ 1 and mRFP-G $\gamma$ 3 in N2a cells, and immunoprecipitated the GFP-fusions. Full-length Gao-GFP strongly pulled down G $\beta$ 1 $\gamma$ 3, whereas Gao-Nt<sup>7</sup>-GFP and Gao-Nt<sup>31</sup>-GFP showed a very faint co-precipitation of G $\beta\gamma$  with no apparent difference between them (Supplementary Fig. 1j). Thus, the preferential localization of Gao-Nt<sup>7</sup>-GFP to the Golgi, as opposed to the dual localization of Gao-Nt<sup>31</sup>-GFP to Golgi and PM, is independent from G $\beta\gamma$ . Together, these results indicate that Nt<sup>7</sup> is sufficient for Gao overall membrane binding, but it tends to drive the Golgi rather than PM localization.

### **Key residues in Gao-Nt<sup>7</sup>**

We next aimed to decode the rules of intracellular localization of Gao-Nt<sup>7</sup> by a systematical point mutation analysis of its residues. Amino acid substitutions were designed using the GPS-Lipid prediction tool<sup>21</sup>. For instance, we introduced the Gly-to-Leu mutation at position 2 of Gao-Nt<sup>7</sup>-GFP as GPS-Lipid predicted very high likelihood for S-palmitoylation at Cys3 in the mutant (not shown). However, the Gly2 mutation led to a complete loss of membrane association as Gao-G2L-Nt<sup>7</sup>-GFP evenly spread over the cytosol and nucleus (Fig. 1i). This result supports the notion that N-myristoylation is a prerequisite for S-palmitoylation in Gao<sup>6</sup>. Accordingly, Gao-G2L-Nt<sup>7</sup>-GFP appeared almost exclusively in the cytosolic fraction (Fig. 1k,l). We then introduced the Cys-to-Asn mutation at position 3 as GPS-Lipid predicted a high score for N-myristoylation at Gly2 in the mutant (not shown). The resulting Gao-C3N-

Nt<sup>7</sup>-GFP was predominantly excluded from the nucleus and showed an ER-like distribution with certain accumulation at Golgi, which might account for the high membrane density of the cisternae stack (Fig. 1j). Nevertheless, Gαo-C3N-Nt<sup>7</sup>-GFP appeared mostly in the cytosolic fraction (Fig. 1k,l), confirming that N-myristoylation confers only weak membrane binding properties<sup>7</sup>. The distinct localization patterns of Gαo-Nt<sup>7</sup> mutants impaired in N-myristoylation and S-palmitoylation were not associated with significant variations in their expression levels (Supplementary Fig. 1k,l), and were emulated by the treatment with the specific inhibitors DDD85646<sup>22</sup> and 2-bromopalmitate (2-BrPal)<sup>23</sup>, respectively (Fig. 1m,n). Defects in S-palmitoylation of Gαo-G2L-Nt<sup>7</sup> and Gαo-C3N-Nt<sup>7</sup> were confirmed by metabolic labeling with [<sup>3</sup>H]palmitate (Supplementary Fig. 1m): only a low level of [<sup>3</sup>H]palmitate incorporation remained for both mutants. These remaining signals were extinguished upon cleavage of fatty acyl thioester bonds by hydroxylamine (Supplementary Fig. 1m), implying that the G2L and C3N GFP fusions were indeed S-palmitoylated. However, as the only Cys residues present in Gαo-C3N-Nt<sup>7</sup>-GFP lay within the GFP sequence, these results indicate that the remaining level of palmitoylation observed in these Nt<sup>7</sup> constructs originated from GFP – the observation frequent in the field.

The most recent substrate recognition motif for NMTs was described as M<sup>1</sup>G[<sup>^</sup>DEFRWY]X[<sup>^</sup>DEKR][ACGST][KR]<sup>7</sup>, with <sup>^</sup> denoting exclusion of residues, and X – any amino acid<sup>18</sup>. The authors did not exclude the possibility that peptides lacking a positive charge at position 7 might also be accepted by NMTs. Thus, N-myristoylation of Gαo □ and all human N-myristoylated Gα subunits □ is not in conflict with the lack of a Lys/Arg residue at position 7 (Supplementary Fig. 1a,d). At position 6, a Ser residue is found in Gαo and its homologues, and Ser is by far the most frequent residue at this position among NMT substrates<sup>18</sup>. Thus, we first introduced point mutations at Ser6 in Gαo-Nt<sup>7</sup> based on the substrate recognition motif described by Castrec *et al.* and on a previous study indicating that Arg, Asn, Phe, and Val can occupy this position as well<sup>24</sup>. Substitution of Ser6 by Ala, Cys, Gly, or Thr showed efficient membrane binding (Fig. 1o) and expression levels similar to

**Gao-Nt<sup>7</sup>** (Supplementary Fig. 1n,o). Interestingly, the S6C mutant displayed a strongly increased PM localization as compared to the wild-type Gao-Nt<sup>7</sup>-GFP (Fig. 1o,q) and a migration shift in SDS-polyacrylamide gels (Supplementary Fig. 1n), suggesting that Cys3 and Cys6 both undergo S-palmitoylation and that PM targeting might be enhanced by the dual S-palmitoylation. N-myristoylation of these mutants was indirectly verified with the inhibitor DDD85646 (Fig. 1p). Conversely, we observed a largely cytosolic and nuclear localization for the constructs in which the Ser6 was substituted by Arg, Asn, Phe and Val (Supplementary Fig. 1p), suggesting that such amino acid substitutions make the N-terminal peptide of Gao a poor substrate for MNTs; the expression levels of the mutant constructs did not significantly differ from Gao-Nt<sup>7</sup>-GFP (Supplementary Fig. 1n,o). We conclude that the lipid modifications and subcellular localization of the Gao-Nt<sup>7</sup> constructs are highly sensitive to even minor changes in this heptapeptide sequence.

### Cysteine position

Intrigued by the S6C mutant, we questioned if the position of the Cys residue within Gao-Nt<sup>7</sup> might play any role in its subcellular localization. Thus, we moved the Cys3 to positions 4 (MGNC-Nt<sup>7</sup>) and 5 (MGNTC-Nt<sup>7</sup>), and expressed the GFP constructs in N2a cells. An Asp residue was placed at position 3 following the GPS-Lipid prediction (not shown).

Unexpectedly, MGNC-Nt<sup>7</sup>-GFP displayed a completely different localization than its parental Gao-Nt<sup>7</sup> (Figs. 1c, 2a), showing PM localization that was not only higher than that of Gao-Nt<sup>7</sup>-GFP, but also of the full-length Gao-GFP (Fig. 2c). Moreover, the perinuclear structures labelled by MGNC-Nt<sup>7</sup>-GFP showed a much lower co-localization with the Golgi marker GM130 compared to Gao-Nt<sup>7</sup>-GFP (Pearson's correlation; Figs. 1c, 2a,d). Instead, the perinuclear structures containing MGNC-Nt<sup>7</sup>-GFP co-localized better with Lactadherin-C2 (mRFP-Lact-C2; Supplementary Fig. 2a,b), a biosensor for phosphatidylserine<sup>25</sup>. These results imply that MGNC-Nt<sup>7</sup>-GFP preferentially associates with the PM-derived endocytic rather than the Golgi-derived secretory pathway. The distinct localization of MGNC-Nt<sup>7</sup>-GFP was not the result of changed expression or membrane binding, as its level (Supplementary



Fig. 1k,l) and presence in the membrane fraction (Fig. 1k,l) were not significantly different from that of G $\alpha$ -Nt<sup>7</sup>-GFP. S-Palmitoylation of Cys4 in MGNC-Nt<sup>7</sup>-GFP was indirectly confirmed by sensitivity to the inhibitor 2-BrPal (Supplementary Fig. 2c). On the other hand, the Cys5 construct MGNTC-Nt<sup>7</sup>-GFP localized at the Golgi and cytosol (Fig. 2b,d) but appeared mostly in the cytosolic fraction upon cell fractionation (Fig. 1k,l). Thus, it appears that Cys5 is not a good substrate for palmitoyl acyltransferases (PATs), as MGNTC-Nt<sup>7</sup>-GFP closely resembles the C3N mutant (Fig. 1j,k,l). Accordingly, metabolic labeling showed a wild-type-like [<sup>3</sup>H]palmitate incorporation for MGNC-Nt<sup>7</sup> and only the residual signal for MGNTC-Nt<sup>7</sup> (Supplementary Fig. 1m). Intriguingly, the subcellular localization of MGNC-Nt<sup>7</sup> was fully recapitulated in the full-length G $\alpha$  when the same mutation was introduced. Specifically, MGNC-G $\alpha$ -GFP showed a higher PM targeting (Figs. 1b, 2e,f) and a much lower co-localization with the Golgi marker GM130 (Figs. 1b, 2e,g) than G $\alpha$ -GFP despite comparable levels of expression (Supplementary Fig. 2d,e).

Altogether, these data uncover a remarkable characteristic of the N-terminal localization code of G $\alpha$ : minor changes in its amino acid sequence can drastically modify the subcellular localization of the protein. Due to its homology with all dual lipidated G $\alpha$  subunits, and to other similarly modified PMPs, we reasoned that this principle might have a broad and evolutionary conserved relevance in biology.

### **The evolution of G $\alpha$ -Nt<sup>7</sup>**

We wanted to determine if Cys residues might exist at different positions within Nt<sup>7</sup> in eukaryotic G $\alpha$  subunits. We searched for G $\alpha$  sequences containing the N-myristoylation signature M<sup>1</sup>GXXX[ACGST]X<sup>7</sup> and found Cys throughout positions 3 to 5 (Supplementary Methods, Supplementary Notes, and Supplementary Table 1). Interestingly, a consensus sequence – MGSLCSR – emerged only for G $\alpha$  sequences containing Cys at position 5 (Supplementary Notes and Supplementary Table 2). Thus, we expressed a GFP-fusion of this sequence in N2a cells. Resultingly, MGSLCSR-Nt<sup>7</sup>-GFP showed stronger membrane

binging than the initially designed MGNTC-Nt<sup>7</sup>-GFP localizing predominantly at Golgi with low cytosolic signal (*cf.* Fig. 2h and Fig. 2b) **despite similar expression level** (Supplementary Fig. 1k,l). When MGSLCSR was introduced into the full-length Gao, however, the cytosolic localization of this mutant was well visible (Supplementary Fig. 2f), **although its expression was comparable to Gao-GFP** (Supplementary Fig. 2d,e). This might probably relate to the fact that G $\alpha$  subunits carrying a Cys at position 5 are virtually absent in Metazoa (Supplementary Notes and Supplementary Table 1).

Then, we expressed our constructs Gao-Nt<sup>7</sup>-GFP, MGNC-Nt<sup>7</sup>-GFP and the consensus MGSLCSR-Nt<sup>7</sup>-GFP in the *Drosophila* Schneider-2 cell line. Remarkably, all constructs retained the same localization patterns as seen in N2a cells: Gao-Nt<sup>7</sup> and MGSLCSR-Nt<sup>7</sup> targeted mainly Golgi stacks labelled by GalT-mRFP, while MGNC-Nt<sup>7</sup> associated largely with PM (Fig. 2i-k). Similar localizations were also seen in HeLa cells (Supplementary Fig. 2g). These data point to highly conserved rules for substrate compartmentalization **across cell types and species**.

### **Direct targeting of Nt<sup>7</sup> variants to Golgi or PM**

Our next goal was to understand the molecular mechanism behind the contrasting subcellular localization of two rather similar sequences: Golgi for Gao-Nt<sup>7</sup> and PM for MGNC-Nt<sup>7</sup> (Fig. 1c and Fig. 2e). N-myristoylation generally occurs during protein synthesis and confers a weak membrane binding to the modified protein<sup>23</sup>, and is essential for the subsequent S-palmitoylation to occur<sup>6</sup>. Our own data showed that myristoylated, but not palmitoylated Gao-Nt<sup>7</sup> and MGNC-Nt<sup>7</sup> are indistinguishable in their localization and only prevented from free cytosolic and nuclear diffusion (Fig. 1n and Supplementary Fig. 2c). Therefore, we speculated that S-palmitoylation is key for subcellular compartmentalization, by itself or in combination with the myristoyl group and/or neighboring amino acids. It has been suggested that S-palmitoylation of PMPs  $\square$  including G $\alpha$  subunits  $\square$  occurs exclusively at the Golgi apparatus, the event followed by their transport to the PM via the secretory

pathway<sup>12</sup>. In addition to the Golgi-to-PM trafficking, a proper steady-state localization of PMPs is controlled by their rapid and ubiquitous depalmitoylation<sup>12</sup>. Thus, we next explored whether the distinct localizations of G $\alpha$ -Nt<sup>7</sup> and MGNC-Nt<sup>7</sup> might involve a differential depalmitoylation and/or Golgi-to-PM transport of the constructs.

We performed live imaging of N2a cells expressing G $\alpha$ -Nt<sup>7</sup>-GFP or MGNC-Nt<sup>7</sup>-GFP during incubation with the depalmitoylation blocker Palmostatin B, an acyl protein thioesterase 1 and 2 inhibitor<sup>26</sup>. Localization of G $\alpha$ -Nt<sup>7</sup> and MGNC-Nt<sup>7</sup> in control cells was not affected during the 45 min of recording (Supplementary Figure 2h,i), whereas both constructs showed progressive changes by Palmostatin B treatment. Particularly, the signal of G $\alpha$ -Nt<sup>7</sup> at Golgi diffused over the surrounding area upon time, whereas its PM localization seemed not to be affected (Fig. 2l, Supplementary Fig. 2j and Supplementary Movie 1). Accordingly, quantification revealed that its PM content did not significantly change during the entire recording time (Supplementary Figure 2j), but its co-localization with the MannII-mRFP Golgi marker showed a significant decrease starting at 25 min of treatment (Fig. 2n). The PM signal of MGNC-Nt<sup>7</sup>-GFP presented no major changes during Palmostatin B treatment as well, but its overall presence in the perinuclear region slightly increased in a pattern that did not resemble the Golgi (Fig. 2m and Supplementary Movie 2). In fact, MGNC-Nt<sup>7</sup> co-localization with the Golgi marker and PM content did not significantly change during the treatment (Fig. 2n and Supplementary Fig. 2k). This analysis supports the notion that the steady-state localization of PMPs results from a palmitoylation/depalmitoylation equilibrium<sup>12</sup>. However, the fact that the PM content of G $\alpha$ -Nt<sup>7</sup> was not affected by Palmostatin B argues against a constant Golgi-to-PM flow of the construct.

We next aimed at visualizing how the Nt<sup>7</sup> constructs are trafficked in the cell. We adapted to our constructs the reverse dimerization (RD) assay, originally designed for the synchronized trafficking of secretory and integral membrane proteins<sup>27</sup>. This method is based on the aggregation of the F36M mutant of FKBP12 (FM) that allows protein tracking upon chemical dissociation. Thus, we intercalated four FM copies (FM<sup>4</sup>) between Nt<sup>7</sup> and GFP and

performed the RD assay, initially in N2a cells and then in HeLa cells as their larger cell bodies grant for a better visualization. The distinct localization of Gao-Nt<sup>7</sup> and MGNC-Nt<sup>7</sup> □ still observed in HeLa cells (Supplementary Fig. 2g) □ was lost by the FM<sup>4</sup> insertion in both cell lines, and cytosolic aggregates of different sizes were visualized instead. After chemical dissociation by the D/D solubilizer, most of the aggregates vanished and the constructs showed their characteristic localizations (Fig. 3a,b for HeLa, data not shown for N2a cells).

Then, live imaging was performed in HeLa cells co-expressing either Nt<sup>7</sup>-FM<sup>4</sup>-GFP construct together with MannII-mRFP as Golgi marker. As expected, Gao-Nt<sup>7</sup>-FM<sup>4</sup>-GFP showed a rapid accumulation at the Golgi once the D/D solubilizer was added (Fig. 3c,e and Supplementary Movie 3). On the other hand, MGNC-Nt<sup>7</sup>-FM<sup>4</sup>-GFP presented a rather slow and miniscule accumulation at the Golgi, as opposed to the rapid PM targeting of the construct (Fig. 3d,e and Supplementary Movie 4). This result does not support a Golgi-to-PM flow of MGNC-Nt<sup>7</sup>-FM<sup>4</sup>-GFP, as PM targeting was not preceded by its Golgi accumulation. To further prove that PM localization of MGNC-Nt<sup>7</sup>-FM<sup>4</sup>-GFP is indeed independent from transport through Golgi, we performed the RD assay under the 20°C temperature block that forces cargos to accumulate in Golgi<sup>28</sup>. As control, we used the GFP-FM<sup>4</sup>-hGH construct that aggregates in the ER lumen and is secreted via the Golgi-mediated transport after chemical dissociation<sup>29</sup>. Incubation with D/D solubilizer for 45 min induced an almost complete secretion of GFP-FM<sup>4</sup>-hGH at 37°C, while at 20°C the construct strongly accumulated in Golgi (Fig. 3f). Conversely, HeLa cells expressing MGNC-Nt<sup>7</sup>-FM<sup>4</sup>-GFP showed a comparable PM localization of the construct at both temperatures (Fig. 3g). Quantification of MGNC-Nt<sup>7</sup>-FM<sup>4</sup>-GFP mean fluorescence intensity in the MannII-mRFP region revealed no significant difference in its Golgi content at 37°C and 20°C (Fig. 3h), indicating that PM targeting of MGNC-Nt<sup>7</sup> does not occur via transport through Golgi.

Altogether, these results imply that the characteristic steady-state localizations of Gao-Nt<sup>7</sup> and MGNC-Nt<sup>7</sup> are not related to the Golgi-to-PM trafficking. Instead, each of the constructs goes directly to its primary destination: Golgi or PM.

## Lipid binding of Nt<sup>7</sup> variants does not explain the preferential localization

Thus far, our data indicate that S-palmitoylation might account for the compartmentalization of Gao-Nt<sup>7</sup> and MGNC-Nt<sup>7</sup>, and that intracellular trafficking is not a major player in their distinctive localizations. We then envisioned two further scenarios that could explain the differential Nt<sup>7</sup> compartmentalization: (i) PATs have no specificity for substrate recognition, and the substrates concentrate at different compartments due to specific interactions, and (ii) PATs discriminate substrates, which in turn accumulate at the compartment where S-palmitoylation takes place. The first scenario involves a certain degree of promiscuity among PATs<sup>11</sup>, and implies that lipidations and a few surrounding amino acids confer specific binding properties *e.g.* to lipids, which are known to differentially accumulate all over the endomembrane system<sup>30</sup>. Additionally, fatty acids other than palmitate can also be attached to the available Cys and might confer different binding specificities to the S-acylated protein<sup>31</sup>. The second scenario requires that PATs discriminate between analogous substrates as small as Nt<sup>7</sup> and that a given substrate accumulates at the compartment where its specific PAT is localized.

To test the first scenario, we used membrane strips spotted with fifteen different lipids found in cellular membranes and performed a protein-lipid overlay assay<sup>32</sup>. As control, we employed a GFP-fusion of the pleckstrin homology (PH) domain of FAPP1 (FAPP1-PH-GFP), that specifically binds to phosphatidylinositol 4-phosphate (PI4P)<sup>33</sup>. N2a cells were transfected with Gao-Nt<sup>7</sup>-GFP, MGNC-Nt<sup>7</sup>-GFP or FAPP1-PH-GFP, and then membrane strips were incubated with cleared cell extracts. As expected, FAPP1-PH-GFP showed a strong binding to the spot containing PI4P (Supplementary Fig. 3a). On the other hand, no apparent difference was found for Gao-Nt<sup>7</sup>-GFP and MGNC-Nt<sup>7</sup>-GFP that mainly bound to phosphatidylserine, cardiolipin, and phosphoinositides, particularly to PI4,5P2 (Supplementary Fig. 3a). A similar lipid-binding pattern was also observed by the larger construct Gao-Nt<sup>31</sup>-GFP (Supplementary Fig. 3a). Thus, the compartmentalization of Gao-Nt<sup>7</sup>

and MGNC-Nt<sup>7</sup> is unlikely to emerge from different lipid-binding affinities, arguing against the first scenario.

### **A novel tool for visualization of local S-palmitoylation in intact cells**

Next, we studied the second scenario, which implies that local S-palmitoylation drives substrate compartmentalization. In mammals, intracellular S-palmitoylation is mediated by zDHHC proteins with PAT activity; 23 zDHHCs exist in humans and 24 in mice<sup>10</sup>. Most of the zDHHCs have four transmembrane domains (TMDs), whereas only two and three members present five and six TMDs, respectively<sup>11</sup>. The majority of zDHHCs localize at Golgi and the remaining are distributed among the ER, PM and endosomes<sup>34, 35</sup>. In order to confirm their subcellular localization, we expressed a collection of twenty-three HA-tagged mouse zDHHCs in N2a cells<sup>36</sup>. As expected, immunostainings revealed that a large number of zDHHCs localized predominantly at Golgi: zDHHC3, 7, 9, 12, 13, 15-17, 21, 23, and 25 (Supplementary Fig. 3b). Six showed a clear PM localization but were also found on endosomes: zDHHC2, 5, 11, 14, 18, and to a lesser extent zDHHC8. The rest of the PATs mostly showed ER localization, while zDHHC4 associated almost exclusively with the nuclear envelope (Supplementary Fig. 3b), a pattern not described in previous studies<sup>34, 35</sup>.

Beside a unique antibody that specifically recognizes palmitoylated PSD-95<sup>37</sup>, experimental approaches to study zDHHC-substrate pair relations are based exclusively on disruptive biochemical and proteomic techniques<sup>38</sup>. To determine if Gao-Nt<sup>7</sup> and MGNC-Nt<sup>7</sup> are differently lipidated at PM vs. Golgi, we aimed at developing a method to visualize local S-palmitoylation in intact cells. Inspired by the nuclear envelope localization of zDHHC4, we engineered zDHHCs that ectopically target the outer nuclear membrane (ONM) to detect mislocalized substrates. We took advantage of some components of the well-studied LINC (linker of nucleoskeleton and cytoskeleton) complexes. LINC complexes are built by proteins of the KASH (Klarsicht, ANC-1, and Syne Homology) family that are embedded in the ONM and interact within the perinuclear space with proteins of the SUN (Sad1 and UNC-84)

family, which in turn are inserted in the inner nuclear membrane<sup>39</sup>. As C-termini of all zDHHCs except zDHHC24 face the cytosol, we hypothesized that addition of a C-terminal KASH-domain might induce their targeting to the ONM (Fig. 4a). To test this hypothesis, we first generated a zDHHC5 construct carrying N-terminal mRFP for visualization and the KASH-domain of syne-1/nesprin-1 at its C-terminus (mRFP-zDHHC5-KASH). In HeLa cells, the KASH-domain alone (mRFP-KASH) is efficiently targeted to the ONM (Fig. 4b), and mRFP-zDHHC5 localized at PM and endosomes as expected (Fig. 4c and Supplementary Fig. 3b). Addition of the KASH domain strongly impaired PM localization of zDHHC5 (Fig. 4d), but a robust ONM targeting was only achieved by the co-expression of the KASH-interacting protein SUN2 (Fig. 4e).

Next, we analyzed if known zDHHC-substrate pair relations can be recapitulated in HeLa cells and chose the PMPs SNAP23, caveolin-1 and flotillin-2. The core of SNAP23 contains 6 Cys residues that are palmitoylated by zDHHC13 and 17<sup>40</sup>. zDHHC7 appears as the main PAT for caveolin-1, which is palmitoylated in 3 Cys residues at its C-terminus<sup>41</sup>. Flotillin-2 is myristoylated at Gly2 and palmitoylated at Cys4, 19 and 20 by zDHHC5<sup>42</sup>. Remarkably, the GFP-fusions of SNAP23 (Supplementary Fig. 4a), caveolin-1 (Supplementary Fig. 4b) and flotillin-2 (Supplementary Fig. 4c) were efficiently recruited to the ONM by the corresponding zDHHC-KASH constructs. Together, we successfully developed a system in intact cells for the visualization of local S-palmitoylation at the ONM and named it the “SwissKASH” assay.

### **S-palmitoylation of Nt<sup>7</sup> at the ONM – the SwissKASH assay**

Once the SwissKASH assay was established, we first tested if PM-associated zDHHCs showed differential substrate specificities for Gαo-Nt<sup>7</sup> and MGNC-Nt<sup>7</sup>. In addition to zDHHC5, the C-terminal KASH-domain effectively targeted zDHHC2, 8, 11, 14 and 18 to the ONM (Fig. 5a-d and Supplementary Fig. 4d,e). Remarkably, Gαo-Nt<sup>7</sup>-GFP and MGNC-Nt<sup>7</sup>-GFP were efficiently recruited to the ONM by co-expression of mRFP-zDHHC11-KASH but not by the control mRFP-KASH (Fig. 5a-d). To quantify these effects, we measured the mean GFP-

fluorescence intensity at the ONM and nearby cytosol, and used their ratio to determine the relative ONM content of the Nt<sup>7</sup> constructs. Quantification revealed a similar ~2.5-fold accumulation of Gao-Nt<sup>7</sup>-GFP and MGNC-Nt<sup>7</sup>-GFP at the ONM by co-expression of mRFP-zDHHC11-KASH (Fig. 5e), suggesting that zDHHC11 equally accepts both Nt<sup>7</sup> constructs as substrate. On the other hand, the KASH-fusions of zDHHC2, 5, 8, 14 and 18 showed no effect on the localization of Gao-Nt<sup>7</sup>-GFP and MGNC-Nt<sup>7</sup>-GFP in HeLa cells (Supplementary Fig. 4d,e). Thus, it appears that the predominant PM localization of MGNC-Nt<sup>7</sup> cannot be explained by major differences in substrate specificity of PM-associated zDHHCs. Our data also identifies zDHHC11 as the main PM-localized PAT for Gao.

Next, we applied the SwissKASH system to Gao-Nt<sup>7</sup> and MGNC-Nt<sup>7</sup> using the eleven Golgi-associated zDHHCs, as all were efficiently targeted to the ONM by the C-terminal KASH-domain (Fig. 5f-i and Supplementary Fig. 5a,b). Notably, mRFP-zDHHC-KASH constructs for zDHHC3 and 7 caused strong ONM accumulation of Gao-Nt<sup>7</sup>-GFP (Fig. 5f,g). No other zDHHCs showed any activity toward Gao-Nt<sup>7</sup>-GFP (Supplementary Fig. 5a), suggesting a high degree of specificity in substrate recognition among Golgi-associated PATs and identifying zDHHC3 and 7 as the main Golgi-localized PATs for Gao. MGNC-Nt<sup>7</sup>-GFP, in contrast, was recruited to the ONM only to a miniscule extent by the KASH-fusions of zDHHC3 and 7 (Fig. 5h,i); the remaining Golgi zDHHC-KASH constructs were inefficient in the recruitment (Supplementary Fig. 5b). Quantification showed that Gao-Nt<sup>7</sup>-GFP accumulates at the ONM roughly 2.0 and 2.5 folds by the co-expression of zDHHC3 and zDHHC7, respectively (Fig. 5j,k). Conversely, MGNC-Nt<sup>7</sup>-GFP presented a significantly lower ONM recruitment of ~1.5 folds by zDHHC3 and 7 (Fig. 5j,k).

As the KASH-fusion of zDHHC11 was able to target both Gao-Nt<sup>7</sup> and MGNC-Nt<sup>7</sup> to the ONM (Fig. 5b,d,e), we asked whether it acts in an indiscriminate manner or can still distinguish among different Nt<sup>7</sup> substrates. Answering this question, we found that mRFP-zDHHC11-KASH induced strong ONM recruitment of MGSSCSR-Nt<sup>7</sup>-GFP but showed a much weaker effect on MGLLCSR-Nt<sup>7</sup>-GFP (Supplementary Fig. 6a-c), both sequences



commonly found in plant G $\alpha$  subunits (Supplementary Notes and Supplementary Table 1). Thus, we conclude that zDHHC3, 7 and 11 all can differentiate among Nt<sup>7</sup> substrates with even slight variations in the amino acid composition.

### **S-palmitoylation of Nt<sup>7</sup> at the ONM: role of enzymatic PAT activity and accessory proteins**

The data above speak for the unexpected specificity of different zDHHCs to Nt<sup>7</sup> substrates that results in specific substrate localizations. We wondered whether these effects could simply result from physical interactions, differential among different zDHHC-substrate pairs. However, we identified that the zDHHCs do not possess high-affinity binding abilities to the Nt<sup>7</sup> sequences, as immunoprecipitation of G $\alpha$ -Nt<sup>7</sup>-GFP, MGNC-Nt<sup>7</sup>-GFP, MGSSCSR-Nt<sup>7</sup>-GFP or MGLLCSR-Nt<sup>7</sup>-GFP did not co-precipitate any of the three tested mRFP-zDHHC11/3/7-KASH constructs (Supplementary Fig. 4f, Supplementary Fig. 5c,d, Supplementary Fig. 6d). Thus, the effects we uncovered are more consistent with specific yet transient, enzymatic interactions among PATs and different substrates.

To confirm that the enzymatic PAT activity was indeed necessary for the selective mislocalization of substrates in the SwissKASH assay, we generated zDHHC-inactive constructs by a Cys-to-Ser mutation in the catalytic DHHC domain<sup>36</sup>. Indeed, the ability of the KASH-fusions of zDHHC3, 7 and 11 to induce ONM accumulation of G $\alpha$ -Nt<sup>7</sup> and MGNC-Nt<sup>7</sup> was completely abolished when the DHHC-mutants were co-expressed instead of the wild-type PATs (Fig. 5l-o).

In recent years, a few accessory proteins have been implicated in regulation of several zDHHCs<sup>43</sup>. Here, we focused on two closely related PMPs: GCP16/Golga7 that has been reported to interact with the PM-localized zDHHC5<sup>44</sup> as well as the Golgi-localized zDHHC9<sup>45</sup>, and Golga7b which associates with zDHHC5 only<sup>46</sup>. We added a Flag-tagged GCP16/Golga7 construct to the SwissKASH system for zDHHC5 and 9, and applied it to G $\alpha$ -Nt<sup>7</sup> and MGNC-Nt<sup>7</sup>. Interestingly, GCP16/Golga7 was strongly recruited to the ONM by

the KASH-fusion construct of zDHHC5 but not zDHHC9 (Supplementary Fig. 7a-d). This effect was not seen when the DHHS-mutant of zDHHC5 was used, suggesting that GCP16/Golga7 is a substrate for zDHHC5 (Supplementary Fig. 7e-g). On the other hand, Gao-Nt<sup>7</sup>-GFP and MGNC-Nt<sup>7</sup>-GFP were not targeted to the ONM in the SwissKASH system using GCP16/Golga7 together with zDHHC5 or 9 (Supplementary Fig. 7a-d).

We then tested a Flag-tagged Golga7b construct in the SwissKASH assay for zDHHC5 and also observed its accumulation at the ONM (Fig. 6a,b). Surprisingly, we also observed ONM recruitment of MGNC-Nt<sup>7</sup>-GFP but not Gao-Nt<sup>7</sup>-GFP under these conditions (Fig. 6a,b); both Golga7b and MGNC-Nt<sup>7</sup> were not targeted to the ONM when the DHHS-mutant of zDHHC5 was used (Fig. 6c). We were not able to detect any ONM localization of MGNC-Nt<sup>7</sup> without the co-expression of Golga7b (Supplementary Fig. 4e), implying that the zDHHC5-Golga7b complex might be involved in substrate recognition similar to zDHHC9-GCP16/Golga7<sup>45</sup>. Quantification showed a significant ONM accumulation of MGNC-Nt<sup>7</sup>-GFP over Gao-Nt<sup>7</sup>-GFP and control (Fig. 6d), which is not due to a differential protein-interaction with mRFP-zDHHC5-KASH, as both Nt<sup>7</sup> constructs did not co-precipitate the PAT (Supplementary Fig. 7h).

Then, we asked whether the higher PM targeting of Gao-Nt<sup>31</sup> compared to Gao-Nt<sup>7</sup> might also be the outcome of different zDHHC substrate specificities. Thus, we tested if zDHHC3, 7, and 11 target Gao-Nt<sup>31</sup> to the ONM with the same efficiency than Gao-Nt<sup>7</sup>. Although zDHHC11-KASH efficiently relocalized Gao-Nt<sup>31</sup>-GFP to the ONM, zDHHC3 and zDHHC7 showed a weaker effect when compared to Gao-Nt<sup>7</sup>-GFP (Fig. 6e-i). Additionally, we did not observe ONM targeting of Gao-Nt<sup>31</sup>-GFP by the co-expression of mRFP-zDHHC5-KASH and Golga7b (Supplementary Fig. 7i). Therefore, the weaker activity of the Golgi zDHHC3 and 7 toward Gao-Nt<sup>31</sup> predicts an increase in its PM accumulation upon time, in agreement with the experimental findings (Fig. 1d).

Together, our data suggest that the distinct steady-state localizations of Gao-Nt<sup>7</sup> and MGNC-Nt<sup>7</sup> are due to the differential substrate specificities of PM- and Golgi-localized enzymatically active zDHHCs, which can further be differently influenced by the accessory proteins.

### Compartment-specific S-palmitoylation of Nt<sup>7</sup>

The notion that compartmentalization is controlled by PATs implies that the localization of Nt<sup>7</sup> constructs might be shifted toward the PM or Golgi by manipulating the expression level of specific zDHHCs. To test this hypothesis, we first co-transfected N2a cells with Gao-Nt<sup>7</sup>-GFP and HA-zDHHC11, and determined its relative PM content and co-localization with the MannII-BFP Golgi marker. Additionally, we co-expressed MGNC-Nt<sup>7</sup>-GFP together with HA-zDHHC3 or HA-zDHHC7. Remarkably, the PM localization of Gao-Nt<sup>7</sup> strongly increased by the overexpression of zDHHC11, whereas its co-localization with MannII-BFP showed a significant decrease (Fig. 7a-d). On the other hand, MGNC-Nt<sup>7</sup> presented a higher co-localization with the Golgi marker but a significant decrease in PM content by the co-expression of zDHHC3 (Fig. 7e-h) or zDHHC7 (Fig. 7i-l). The effects of the different zDHHCs on Gao-Nt<sup>7</sup> and MGNC-Nt<sup>7</sup> were not evident upon co-expression of the corresponding DHHS-mutants (Fig. 7b,f,j and Supplementary Fig. 8a,b). The changes in localization of the Nt<sup>7</sup> constructs were not due to variations in their expression level upon co-expression of the different zDHHCs (Supplementary Fig. 8c-f). No changes in the overall localization of Gao-Nt<sup>7</sup> and MGNC-Nt<sup>7</sup> could be observed upon co-expression of zDHHC3/7 and zDHHC11, respectively (Supplementary Fig. 8g-i). Similarly, co-expression of zDHHC5 and Golga7b appeared not to alter the localization pattern of the Nt<sup>7</sup> constructs (Supplementary Fig. 8j,k). Next, we analyzed the localization of Gao-Nt<sup>7</sup> and MGNC-Nt<sup>7</sup> in cells after depletion of zDHHCs. We employed HeLa instead of the murine N2a cells for this analysis, as siRNAs have been used successfully to downregulate the expression of human zDHHCs in this cell line<sup>47</sup>. We first determined if, in addition to zDHHC5 (Fig. 4c), zDHHC3, 7 and 11 show localizations in HeLa similar to those in N2a cells (Supplementary Fig. 3b). Accordingly, HA-

tagged zDHHC3 and 7 were predominantly localized at the Golgi, while zDHHC11 was at the PM (Supplementary Fig. 9a-c). Since only minor effects were observed by single siRNA transfections (data not shown), we expressed Gao-Nt<sup>7</sup>-GFP or MGNC-Nt<sup>7</sup>-GFP in cells pretreated with siRNAs against the pairs of zDHHC3/7 and zDHHC5/11. Gao-Nt<sup>7</sup> and MGNC-Nt<sup>7</sup> localized normally in HeLa cells transfected with control siRNA, with Gao-Nt<sup>7</sup> predominantly at the Golgi and MGNC-Nt<sup>7</sup> mainly at the PM (Fig. 8a,d). Remarkably, the simultaneous depletion of the Golgi-associated zDHHC3 and 7 clearly affected the localization of Gao-Nt<sup>7</sup>: the construct exhibited a much weaker presence at the Golgi whereas its targeting to the PM appeared enhanced (Fig. 8b). MGNC-Nt<sup>7</sup>, however, was not affected by this treatment (Fig. 8e), but its localization was notoriously shifted toward the Golgi in HeLa cells upon the concomitant downregulation of the PM-associated zDHHC5 and 11 (Fig. 8f). On the other hand, distribution of the Gao-Nt<sup>7</sup> construct did not show major changes in cells depleted of zDHHC5 and 11 (Fig. 8c). Quantification showed a significant reduction in the relative Golgi localization of Gao-Nt<sup>7</sup> by the downregulation of zDHHC3/7, and a significantly increase in the Golgi content of MGNC-Nt<sup>7</sup> upon zDHHC5/11 depletion (Fig. 8g).

Collectively, these data confirm the conclusion that local S-palmitoylation plays a pivotal role in the compartmentalization of Gao-Nt<sup>7</sup> and MGNC-Nt<sup>7</sup>, and that the localization pattern can be shifted upon up- or down-regulations of different PATs.

### **Targeting full-length Gao to the ONM**

We analyzed next if the SwissKASH assay might reveal local S-palmitoylation of the full-length Gao. Thus, we expressed Gao-GFP together with the KASH-fusions of zDHHC3, 7, and 11, as they showed activity toward Gao-Nt<sup>7</sup> in N2a cells. Remarkably, full-length Gao-GFP was targeted to the ONM by these zDHHC constructs (Fig. 9a-d). Alternatively, the Cys4 mutant of Gao, MGNC-Gao-GFP, localized at the ONM primarily when the KASH-fusion for zDHHC11 was co-expressed (Supplementary Fig. 9d), similar to what we observed

for MGNC-Nt<sup>7</sup>-GFP (Fig. 5d,h,i). MGNC-Gao-GFP was additionally targeted to the ONM by co-expression of mRFP-zDHHC5-KASH and Golga7b, an effect not seen for Gao-GFP (Fig. 9e,f). Overall, our data confirm that the distinct steady-state localization of Gao is controlled by the PM- and Golgi-localized zDHHCs.

To explore a potential role of ER-resident PATs in Gao localization, we co-expressed Gao-GFP with the HA-tagged zDHHC1, 4, 6, 19, 20 and 24 in HeLa cells, but observed no apparent effect in Gao distribution (Supplementary Fig. 9e). We noticed that zDHHC1 and to a lesser extent zDHHC20 were also present at the PM in HeLa cells (Supplementary Fig. 9e), a pattern that was not obvious in N2a cells (Supplementary Fig. 3b). Thus, we generated mRFP-KASH fusions for these PATs and tested their ability to target Gao-Nt<sup>7</sup> and MGNC-Nt<sup>7</sup> to the ONM in the SwissKASH assay. The KASH-fusion efficiently targeted zDHHC1 and 20 to the ONM, but they were not able to recruitment Gao-Nt<sup>7</sup> or MGNC-Nt<sup>7</sup> (Supplementary Fig. 10a-d).

Finally, we wondered whether the pool of Gao targeting the ONM would keep its functionality. To address this, we first tested the ability of Gao to interact with Gβ1γ3. As expected, Gao-GFP and mRFP-Gβ1γ3 strongly co-localized at the PM and endomembranes in control HeLa cells (Supplementary Fig. 10e). When these components of the G protein heterotrimer were expressed together with zDHHC11 in the SwissKASH assay, mRFP-Gβ1γ3 relocated to the ONM in the pattern identical to Gao-GFP (Fig. 9g). We tested next if a downstream signaling molecule might be co-recruited to the ONM by Gao, and selected RGS19 which preferentially interacts with the active, GTP-loaded Gao<sup>48</sup>. In addition to Gao-GFP wild-type, we used the GTPase-deficient mutant of Gao (Q205L) that is present in the GTP-loaded state in cells. Accordingly, a clear ONM accumulation of a His<sub>6</sub>-tagged RGS19 construct was observed when the SwissKASH system was applied to the Q205L mutant (Fig. 9h) but not the wild-type Gao (Supplementary Fig. 10f). Altogether, our SwissKASH system shows that local S-palmitoylation of Gao can cause its in-situ accumulation in the signaling-competent form, indicating that zDHHC selectivity and subcellular localization are key

players in the substrate compartmentalization of the G protein, and potentially PMPs in general.

## DISCUSSION

That G $\alpha$  subunits can be found at the Golgi apparatus is known for 30 years<sup>49</sup>. The Golgi localization of G $\alpha$  subunits was assumed to be part of their trafficking pathway to the cell periphery, although some non-canonical functions of G-proteins were described at compartments other than the PM<sup>50</sup>. Only recently, the Golgi-pool of G $\alpha$  subunits has been implicated in the downstream signaling of typical GPCRs<sup>3</sup> and the KDEL receptor<sup>4,5</sup>. Thus, subcellular compartmentalization has emerged as an important player in G protein functions. The present study provides an in-depth characterization of key elements controlling N-myristoylation, S-palmitoylation and localization of G $\alpha$ . More importantly, we developed a system  $\square$  SwissKASH  $\square$  for the rapid detection of zDHC-substrate pair relations in intact cells, opposing to the disruptive biochemical and proteomic techniques currently used to study S-palmitoylation<sup>38</sup>. Altogether, this work supports a model in which local S-palmitoylation by distinct zDHCs is crucial for G $\alpha$  compartmentalization, and most likely for other PMPs (Fig. 10). In this model, N-myristoylation allows the nascent protein to reach virtually the whole endomembrane system. Subsequently, specific PM- and Golgi-localized zDHCs catalyze S-palmitoylation of PMPs, which in turn accumulate at these compartments. Our model is in agreement with the local S-palmitoylation described for substrates such as PSD-95 at dendritic spines<sup>37</sup> and calnexin at the ER<sup>47</sup>, but adds the Golgi as a compartment in which PMPs can be locally modified and retained. To our knowledge, S-palmitoylation via the large number of Golgi-localized zDHCs has been exclusively discussed in the context of Golgi-to-PM transport of integral<sup>52</sup> and PMPs<sup>12</sup>. We hereby challenge this notion and show instead that PMP localization to one compartment or another (including Golgi and PM) is not a consequence of sequential trafficking of the PMPs but rather a direct localization driven by the substrate-specific PAT activities at different compartments.

The fact that zDHCs can modify multiple substrates has led to the notion that S-palmitoylation is nonspecific and proximity-based. Accordingly, a recent study demonstrated

the stochastic S-palmitoylation of engineered Cys residues in membrane proteins, proposing that catalysis is determined by substrate accessibility and not specific sequence motifs<sup>53</sup>. Several zDHHCs, however, contain PDZ-binding motifs, SH3 domains or ankyrin-repeats outside the catalytic DHHC core that have been implicated in enzyme-substrate interactions<sup>11</sup>. Importantly, our study uncovered a striking substrate specificity for several zDHHCs toward peptides as small as G $\alpha$ -Nt<sup>7</sup>. We additionally showed that minor sequence modifications might result not only in drastic changes in the substrate recognition by zDHHCs, but also in substrate localization (Fig. 10). Another interesting implication of this model is that cells and tissues could shift the localization and associated function of PMPs toward one specific compartment or another by controlling the expression of zDHHCs. The large number of zDHHC genes and their distinct tissue-specific expression patterns in humans is thus not surprising<sup>34</sup>. This property might be widespread among Metazoa as Nt<sup>7</sup> constructs showed remarkably similar localization in *Drosophila* and mammalian cells, and *Drosophila* contains also a large number of zDHHC genes that are differentially expressed in embryonic and adult tissues<sup>54</sup>. Regulation of compartmentalized PMP functions might also be acutely regulated by controlling the action of the PATs locally. This seems true for zDHHC5, as several recent studies point to an intricate regulation of its activity and localization by posttranslational modifications and accessory proteins (see below)<sup>43, 55</sup>.

The SwissKASH system we developed in this study relies on tagging zDHHCs at their C-terminus with the KASH domain of syne-1/nesprin-1 for the ectopic ONM targeting. We applied this strategy only to PM- and Golgi-localized zDHHCs but we expect it will also work for the remaining PATs, excluding zDHHC24 with a predicted C-terminus facing the lumen<sup>38</sup>. Some of the ER-localized zDHHCs, however, showed a prominent ONM localization that might hinder their usage in the SwissKASH system. In this case, alternative tags for the targeting of ER-localized zDHHCs to the PM, Golgi or mitochondria might be developed. The C-terminal domain of zDHHCs contains two non-catalytic TTxE and PaCCT (palmitoyltransferase conserved C-terminus) motifs that seem relevant for the overall protein



structure<sup>56</sup>. The extreme C-terminal region of zDHHCs appears unstructured and is most likely not involved in the binding and presentation of substrates<sup>11</sup>, implying that the fusion of a KASH domain does not interfere with substrate specificity. Accordingly, our SwissKASH pointed to zDHHC3, 7, and 11 as the major PATs for Gao. This result agrees with a previous study showing zDHHC3 and 7 as the main PATs for Gai2, Gaq and Gas<sup>57</sup>, while zDHHC11 activity toward Ga subunits has not been detected. This discrepancy could be explained by a differential turnover rate of PM- and Golgi-localized Ga subunits. For instance, if the turnover of the PM pool of Gai2 is much faster than its Golgi pool, the S-palmitoylation of Gai2 by the PM-localized zDHHC11 might have gone unnoticed by the biochemical methods used in that study. The SwissKASH system might therefore provide an advantage in sensitivity by targeting zDHHCs to the ONM, as even small amounts of a substrate are visible at this ectopic compartment. In agreement with that, we found that in our SwissKASH assay Gai2 is recruited to the ONM by zDHHC11 as well as Gao is (data not shown).

Several recent studies have revealed that various zDHHCs are regulated by accessory proteins which control their activity, stability and/or localization<sup>43</sup>. We focused here on GCP16/Golga7 and Golga7b, and introduced them into the SwissKASH approach. We found that the zDHHC5-Golga7b complex efficiently targeted MGNC-Nt<sup>7</sup> to the ONM, an effect not observed for Gao-Nt<sup>7</sup> or in the absence of Golga7b. Interestingly, our MGNC-Nt<sup>7</sup> construct resembles the N-terminus of flotillin-2 (also known as reggie-1) that is myristoylated at Gly2 and palmitoylated at Cys4 by zDHHC5<sup>42</sup>, and it is similarly localized at the PM but excluded from Golgi<sup>58</sup>. These data indicate that the position of the palmitoylatable Cys within a myristoylated Nt<sup>7</sup> peptide might be relevant for substrate specificity by zDHHC5. In the SwissKASH assay, zDHHC5 efficiently targeted both GCP16/Golga7 and Golga7b to the ONM although only the zDHHC5-Golga7b complex co-recruited MGNC-Nt<sup>7</sup>, pointing to striking different functions for these complexes. Thus, the SwissKASH system might also be applied for functional studies of the complexes formed by zDHHCs and accessory proteins.

A polybasic stretch present in the N-terminal region of all G $\alpha$  subunits has been implicated in PM binding<sup>59</sup>. The G $\alpha$ -Nt<sup>31</sup> construct containing the basic region within the  $\alpha$ -helix showed indeed a greater steady-state localization at the PM compared to G $\alpha$ -Nt<sup>7</sup>. In the SwissKASH system, the presence of the  $\alpha$ -helix in G $\alpha$ -Nt<sup>31</sup> appears to impact substrate recognition by the Golgi-associated zDHHC3 and 7, but not by the PM-localized zDHHC11. Thus, these data point to a second level of complexity in the substrate affinity by zDHHCs, where regions distant from the palmitoylatable Cys might subserve regulatory functions. How the polybasic region in G $\alpha$  impacts the substrate specificity by zDHHCs remains to be clarified.

S-palmitoylation has gained much attention lately as a potential target for drug discovery to combat pathologies mediated by proteins such as the oncogenic Ras and infectious diseases like malaria caused by *Plasmodium falciparum* or the respiratory syndromes caused by coronaviruses<sup>60-62</sup>. Our SwissKASH system could enable screens for molecules that perturb site- and zDHHC-specific S-palmitoylation of pathological proteins. This approach may provide an attractive alternative to directly target the desired oncogene (or protein of another pathogenic activity), focusing instead on developing tools to target the zDHHCs controlling the proper (or pathological) localization of the protein. In this regard, zDHHCs can be targeted by the drug discovery efforts. The large number of these enzymes in humans and their distinct expression patterns provide the reasoning to expect the power of such an approach in obtaining the favorable pharmacodynamics with limited side effects. Another approach might aim at targeting the specific zDHHC-substrate interaction pairs; this avenue is expected to deliver even more specific targeted therapies.

To sum up, we have delineated the code describing the Golgi vs. PM localization of the G protein G $\alpha$ , showed that these two localizations are independent from the previously assumed Golgi-to-PM trafficking, and discovered a general mechanism controlling PMP localization to its target membrane through the substrate selectivity of differently localized PATs. This major insight into the cell biology of protein subcellular localization may pave the way to novel drug discovery principles.

## METHODS

### Antibodies and reagents

Monoclonal antibodies (mAbs) against flotillin-2 (Cat# 610383) and GM130 (Cat# 610823) were from BD Biosciences, mAb against HA-tag (Cat# 11867423001) from Roche, mAb against mRFP (Cat# sc-101526) from Santa Cruz Biotechnology, mAb against His<sub>6</sub> (Cat# 34650) from Qiagen, mAb against GAPDH (Cat# GTX28245) and polyclonal antibody (pAb) against GFP (Cat# GTX113617) were from GeneTex, mAb against  $\alpha$ -tubulin (Cat# T6199) and pAb against Flag-tag (Cat# F7425) were from Sigma-Aldrich, and a pAb against GFP (Cat# 632592) was from Takara. Secondary Abs for immunostaining and Western blots were from Jackson ImmunoResearch. DAPI (Cat# 32670), Cycloheximide (Cat# C4859), and Palmostatin B (Cat# 178501) were from Sigma-Aldrich, D/D solubilizer (Cat# 635054) from Clontech, VECTASHIELD Mounting Medium (Cat# H-1400) from Vector Laboratories, Glutathione Sepharose beads (Cat# GE17-0756-01) from GE Healthcare, DDD85646 (Cat# 13839) from Cayman Chemical, 2-bromopalmitate (Cat# sc-251714) from Santa Cruz Biotechnology, and Membrane lipid strips (Cat# P-6002) from Echelon Biosciences.

### Cell lines and culture conditions

Male mouse neuroblastoma Neuro-2a (N2a; ATCC CCL-131) and female human epithelial HeLa (ATCC CCL-2) cells were maintained in MEM (Thermo Fisher Scientific), supplemented with 10% FCS, 2 mM L-glutamine, 1 mM pyruvate, and 1% penicillin-streptomycin at 37°C and 5% CO<sub>2</sub>.

Male *Drosophila* Schneider-2 (S2) cells were maintained in Schneider's *Drosophila* Medium (Lonza) supplemented with 10% FCS and 1% penicillin-streptomycin at 28°C.

All vector transfections were carried out with X-tremeGENE HP (Roche) or FuGENE HD (Promega) according to manufacturer's instructions.

## Plasmids and molecular cloning

The plasmids Gao-GFP WT and Q205L mutant, GalT-GFP, His<sub>6</sub>-RGS19, and GalT-mRFP for *Drosophila* expression were previously described<sup>5, 48</sup>. To generate the GFP-fusion of Gao-Nt<sup>7</sup> and Gao-Nt<sup>31</sup>, the fragments were PCR-amplified (primers listed in Supplementary Table 3) from Gao-GFP, products were cut with KpnI/AgeI and cloned in frame into the same sites of pEGFP-N1 (Clontech). The Gao-Nt<sup>8-31</sup>-GFP sequence was PCR-amplified from Gao-Nt<sup>31</sup>-GFP, the product cut with KpnI/NotI and used to replace the GFP sequence in pEGFP-N1 cut with the same enzymes. Gao-Nt<sup>7</sup>-GFP was used as template for the PCR amplification of the following Nt<sup>7</sup>-GFP sequences: Gao-G2L, Gao-C3N, Gao-S6A, Gao-S6C, Gao-S6G, Gao-S6T, Gao-S6F, Gao-S6N, Gao-S6R, Gao-S6V, MGNC, MGNTC, MGCKR, MGCKE, MGCDR, MGCDE, MGCKH, MGCDH, MGS�CSR, MGSSCSR, and MGLLCSR. All PCR products were cut with KpnI/NotI and then used to exchange the corresponding GFP sequence from pEGFP-N1. For *Drosophila* expression, the plasmids containing the constructs Gao-Nt<sup>7</sup>-GFP, MGNC-Nt<sup>7</sup>-GFP, and MGS�CSR-Nt<sup>7</sup>-GFP were cut with EcoRI/NotI and inserts were ligated into the same sites of pAc5.1/V5-HisA (Thermo Fisher Scientific). The full-length Gao mutants MGNC-Gao and MGS�CSR-Gao were PCR-amplified from Gao-GFP, cut and inserted in frame into the KpnI/ApaI sites of pEGFP-N1. For the generation of Gao-Nt<sup>7</sup>-FM<sup>4</sup>-GFP and MGNC-Nt<sup>7</sup>-FM<sup>4</sup>-GFP, the FM<sup>4</sup> sequence was PCR-amplified from the GFP-FM<sup>4</sup>-hGH plasmid (Andrew Peden, University of Sheffield), cut with AgeI/PstI and ligated in frame into the same sites of Gao-Nt<sup>7</sup>-GFP and MGNC-Nt<sup>7</sup>-FM<sup>4</sup>-GFP. The mRFP-Gβ1 construct was created by exchanging the AgeI/BsrGI mCerulean sequence from mCerulean-Gβ1<sup>63</sup> with the corresponding from pmRFP-C1 (Claudia Stuermer, University of Konstanz). Similarly, the mRFP-Gγ3 was created by substituting the AgeI/BsrGI GFP sequence in the GFP-Gγ3 plasmid<sup>5</sup> with the mRFP sequence. The mRFP-Lact-C2 was done by replacing the AgeI/BsrGI GFP sequence from GFP-Lact-C2 (kindly provided by Gregory Fairn; University of Toronto) with the sequence from pmRFP-C1. MannII-mRFP was created by exchanging the BamHI/NotI sequence from MannII-BFP<sup>64</sup> with the equivalent sequence from pmRFP-N1 (Claudia Stuermer, University of Konstanz). The

mRFP-KASH and BFP-KASH plasmids were cloned by substituting the AgeI/BsrGI GFP sequence in the GFP-KASH plasmid<sup>65</sup> with the analogous sequence from pmRFP-C1 and pEBFP2-C1 (Addgene, 54665), respectively. The plasmid for the non-tagged SUN2 expression was cloned by cutting the SUN2-CFP plasmid<sup>66</sup> with EcoRI and BamHI, blunting with Phusion DNA Polymerase (New England Biolabs), and re-ligating the plasmid thus introducing a stop codon in frame with the SUN2 sequence. The SUN2-GFP was generated by replacing the Sall/NotI CFP fragment with the XhoI/NotI GFP fragment from pEGFP-N1. The mRFP-zDHHC5 wild-type and DHHS-mutant were cloned by cutting the BamHI/NotI sequence of pCI-neo-Flag-DHHC5 and pCI-neo-Flag-DHHS5<sup>67</sup>, and ligating in frame into the BglII/PspOMI sites of pmRFP-C1. For the generation of mRFP-zDHHC5-KASH wild-type and DHHS-mutant, the sequences mRFP-zDHHC5 and mRFP-zDHHS5 were PCR-amplified from mRFP-fusions, cut with NheI/KpnI and used to exchange the GFP sequence cut with the same enzymes from GFP-KASH. Masaki Fukata (National Institutes of Natural Sciences, Japan) generously provided a collection of 23 mouse zDHHC isoforms cloned into the pEF-Bos-HA plasmid<sup>36</sup>. Slightly different cloning strategies were used for the generation of all mRFP-zDHHC-KASH constructs. Specifically, the zDHHC2, 11 and 18 sequences were PCR-amplified from the corresponding pEF-Bos-HA plasmids, cut with AgeI/KpnI and ligated in frame into the BspEI/KpnI sites of mRFP-KASH and also BFP-KASH for zDHHC11. The sequence for zDHHC1, 3, 7, 12, 13, 15, 16, 20, 21, and 25 were PCR-amplified from the original pEF-Bos-HA plasmids, cut with BglII/EcoRI and inserted into the same sites of mRFP-KASH. The zDHHC8 sequence was PCR-amplified from pEF-Bos-HA-DHHC8, cut with XhoI/EcoRI and ligated into the same sites of mRFP-KASH. zDHHC9 was PCR-amplified from pEF-Bos-HA-DHHC9, cut with SacI/BamHI and ligated into the same sites of mRFP-KASH. The zDHHC14 sequence was PCR-amplified from pEF-Bos-HA-DHHC14, cut with AgeI/BamHI and ligated into the BspEI/BamHI sites of mRFP-KASH. The zDHHC17 and 23 were PCR-amplified from the corresponding pEF-Bos-HA plasmids, cut with BglII/HindIII and inserted into the same sites of mRFP-KASH. All inactive DHHS-mutants for the relevant mRFP-zDHHC-KASH and HA-zDHHC constructs were obtained by point mutagenesis. The

GFP-fusion of reggie-1/flotillin-2 was previously described<sup>68</sup>. Tamas Balla (National Institutes of Health) kindly provided the FAPP1-PH-GFP plasmid, Bo van Deurs (University of Copenhagen) the GFP-caveolin-1 construct, **Scott Dixon (Stanford University) the GCP16/Golga7-Flag**, and **Mark Collins (University of Sheffield) the Golga7b-Flag**. The GFP-SNAP23<sup>69</sup> and pGEX6P1-GFP-Nanobody<sup>70</sup> plasmids were obtained from Addgene.

#### Structure alignment

The Gao structures 6g79, 6oik, and 6k41 were aligned using the PyMOL software ([pymol.org](http://pymol.org)). The N-terminal  $\alpha$ -helix of 6g79 was set as reference to align all structures. A similar alignment was done for the Gai1 structures 1gg2, 5kdo, 6ddf, 6osa, 6n4b, 6kpf, and 6k42, setting the N-terminal  $\alpha$ -helix of 5kdo as reference. IDs and G $\alpha$  structures were obtained from RCSB-PDB ([rcsb.org](http://rcsb.org)).

#### Immunofluorescence and microscopy

For microscopy, N2a and HeLa cells were transfected for 7 hr, trypsinized and seeded on poly-L-lysine-coated coverslips in complete MEM for additional 15 hr before fixation. When indicated, cells were seeded in complete MEM supplemented with 10  $\mu$ M DDD85646 or 100  $\mu$ M 2-bromopalmitate. S2 cells were transfected for 24 hr, washed one time with PBS, resuspended in complete media, and seeded on poly-L-lysine-coated coverslips for 30 min before fixation. All cells were fixed for 20 min with 4% paraformaldehyde in PBS. For immunostaining, cells were permeabilized for 1 min using ice-cold PBS supplemented with 0.1% Triton X-100, blocked for 30 min with PBS supplemented with 1% BSA, incubated with the primary antibody in blocking buffer for 2 hr at room temperature (RT), washed and subsequently incubated with secondary antibodies and DAPI in blocking buffer for 2 hr at RT. All fluorescent-labelled secondary antibodies were from Jackson ImmunoResearch. Coverslips were finally mounted with Vectashield on microscope slides. Cells were recorded with a Plan-Apochromat 63x/1.4 oil objective on a LSM800 Confocal Microscope and further processed using the ZEN blue software (all Zeiss). When required, mean fluorescence intensity was determined from confocal images using ImageJ (National Institutes of Health).

Images were not recorded using the same confocal settings, therefore ratio fluorescence values, such as Golgi fluorescence vs. total fluorescence or PM vs. total, were used for quantifications (see below). As a proof of validity of this approach, we recorded >50 cells expressing the GFP constructs under identical confocal settings, finding that the Golgi signal from Gao-Nt<sup>7</sup>-GFP is ca. 1.5-fold higher, and its PM signal is ca. 2-fold lower, than those of Gao-Nt<sup>31</sup>-GFP (data not shown), recapitulating the ratio representation we adopted in Fig. 1e,f and further elsewhere.

#### PM and Golgi accumulation

N2a cells expressing the GFP-fusion constructs were immunostained as indicated above using a mouse monoclonal antibody (mAb) against GM130 to visualize the Golgi apparatus, and a DAPI staining for the nucleus (both not shown in all final images). Alternatively, co-expression of the MannII-BFP construct was used to label the Golgi (see below under “co-localization analysis” for plasmid ratio used for transfection). To avoid interferences due to different expression levels of GFP-constructs among cell population, mean fluorescence intensity was measured at the GM130- or MannII-BFP-positive Golgi region as well as at the total cell area, and ratio values were used to determine the relative Golgi accumulation of the constructs. Simultaneously, mean fluorescence intensity was determined at an unbroken region of the PM lacking membrane protrusions, and the ratio over total cell fluorescence was used to define relative PM content for each GFP-construct. One-way ANOVA or Student’s t-test were used for statistical analysis of  $\geq 50$  cells per condition and from at least 3 independent experiments.

#### Co-localization analysis

N2a cells were transfected and immunostained against GM130 as described above. To determine co-localization of the various GFP constructs and the GM130 signal, an area covering the whole perinuclear region but excluding the PM was selected in confocal images and the Pearson's correlation was calculated using the co-localization tool of ImageJ. The same analysis was done in N2a cells co-expressing the phosphatidylserine biosensor mRFP-

Lact-C2<sup>25</sup> and the different GFP-fusions, transfected at equal plasmid ratio. The Golgi marker GalT-GFP was used as control. This analysis was also done in N2a cells co-transfected with GFP-fusions, HA-tagged zDHHCs **or empty pcDNA3.1(+)**, and MannII-BFP as the Golgi marker (2:4:1 plasmid ratio). One-way ANOVA test was used for statistical analysis of >30 cells per condition.

#### siRNA knockdown experiments

For siRNA transfection, 1.2x10<sup>5</sup> HeLa cells were seeded on culture plates, and transfected 24 hr later with 40 pmol of control siRNA (1027281) or 20 pmol of each siRNAs against human zDHHC3 (SI02777642), zDHHC5 (SI04159694), zDHHC7 (SI00766850), and zDHHC11 (SI04365914) (all Qiagen) using TransIT-X2 transfection reagent (Mirus). siRNAs against the different zDHHCs were previously validated in HeLa cells<sup>47</sup>. After 48 hr, cells were transfected with GFP-fusion constructs, and 24 hr later cells were fixed and immunostained against GM130. Golgi accumulation of the constructs was determined from confocal images (all steps as described above). One-way ANOVA test was used for statistical analysis of >50 cells per condition. The relative PM localization of GFP-constructs was not determined for HeLa cells due to their heterogenous morphology, which does not allow for the clear visualization of a PM monolayer in the majority of the cells within the population.

#### Biochemical analyses

Transfected N2a cells were lysed with ice-cold Lysis buffer (20 mM Tris-HCl, pH 7.5, 100 mM NaCl, 5 mM MgCl<sub>2</sub>, 2 mM EDTA, 1% Triton X-100, 0.1% SDS, and 10% glycerol) supplemented with a protease inhibitor cocktail (Roche). Extracts were cleared by centrifugation at 15,000xg and 4°C, boiled at 95°C for 5 min and finally analyzed by SDS-PAGE and Western blots using antibodies against GFP,  $\alpha$ -tubulin as loading control, and HA-tag when required. HRP-conjugated secondary antibodies were used for enhanced chemiluminescence (ECL) detection. Quantification of blots was done using ImageJ from at



least 3 independent experiments and statistical analysis was carried out using Student's t-test.

#### Co-immunoprecipitation

The recombinant GST-tagged Nanobody against GFP<sup>70</sup> expressed in *Escherichia coli* RosettaGami (Novagen) was purified with glutathione Sepharose 4B beads according to manufacturer's instructions. Protein purity was assessed by SDS-PAGE and Coomassie blue staining.

N2a cells were co-transfected with the different Gαo-GFP constructs and mRFP-Gβ1/Gγ3 at 1:1:1 plasmid ratio. HeLa cells were transfected with the constructs used for the SwissKASH assay at the same plasmid ratio described below. SUN2-GFP was used as positive control for the interaction with mRFP-zDHHC-KASH constructs. After 24 hr transfection, cells were resuspended with ice-cold GST-lysis buffer (20 mM Tris-HCl, pH 8.0, 1% Triton X-100 and 10% glycerol in PBS) supplemented with a protease inhibitor cocktail (Roche) and 50 μM Palmostatin B (for SwissKASH-derived samples), and passed 10 times through a 25G needle. Extracts were cleared by centrifugation at 15,000xg for 15 min at 4°C, and supernatants were incubated with 2 μg of purified GST-tagged GFP-Nanobody for 30 min on ice. Then, 20 μL of Glutathione Sepharose 4B beads were added and samples rotated overnight at 4°C. Beads were repeatedly washed with GST-lysis buffer, prepared for SDS-PAGE, and finally analyzed by Western blot using antibodies against GFP, mRFP, and Flag-tag when needed, as well as HRP-conjugated secondary antibodies for ECL detection. All co-immunoprecipitations were done in duplicate with very similar outcomes.

#### Crude subcellular fractionation

N2a cells were transfected for 24 hr and cell extracts were prepared using non-denaturing conditions and fractionated by high-speed centrifugation as previously described<sup>68</sup>. Briefly, cells were rinsed twice with PBS and resuspended in hypo-osmotic buffer (20 mM HEPES, pH 7.0) supplemented with a protease inhibitor cocktail. The cell suspension was passed 20 times through a 25G needle, and nuclei and unbroken cells were removed by centrifugation

at 700xg for 10 min at 4°C. The supernatant was centrifuged at 100,000xg for 60 min at 4°C. The new supernatant (cytosolic fraction) was directly prepared for SDS-PAGE, and the pellet (membrane fraction) was gently washed with hypo-osmotic buffer and resuspended in GST-lysis buffer supplemented with 0.5% SDS and protease inhibitors. The membrane fraction was cleared by centrifugation at 15,000xg for 20 min at 4°C, and prepared for SDS-PAGE. Western blot analysis was done as above using the antibodies against GFP, and flotillin-2 and GAPDH as endogenous membrane and cytosolic markers, respectively. Two-way ANOVA was used for statistical analysis of 4-6 independent experiments.

#### Metabolic radiolabeling with [<sup>3</sup>H]palmitate

[<sup>3</sup>H]palmitate radiolabeling was performed as previously described<sup>51</sup>. Briefly, transfected HeLa cells were starved for 1 hr in MEM supplemented with 10 mM HEPES, pH 7.4, and subsequently radiolabeled for 3 hr with 70 µCi/ml of [9,10-<sup>3</sup>H]palmitate (Cat# ART-0129-25; American Radiolabeled Chemicals, Inc.). Cells were then washed, lysed in a 0.5M Tris-HCl, pH 7.4 buffer containing 0.5% Nonidet P-40, 20 mM EDTA, 10 mM NaF, 2 mM benzamidine and a protease inhibitor cocktail (Roche), and cleared by centrifugation. Supernatants were incubated overnight with anti-GFP agarose beads (Cat# GTA-100; Chromotek), beads were then washed several times, and incubated for 10 min at room temperature with 1M hydroxylamine, pH 7.4 (Cat# 159417; Sigma-Aldrich) or 2M Tris-HCl, pH 7.4. Beads were finally prepared for and loaded into a 4-20% gradient SDS-PAGE. One third of the immunoprecipitate was analyzed by WB using antibody against GFP, and two thirds were used for fluorography on film. The metabolic labeling was done in triplicate with similar outcomes.

#### Protein-lipid overlay assay

After 24 hr of transfection, N2a cells were washed twice with TBS (50 mM Tris-HCl, pH 8.0, 150 mM NaCl and 10% glycerol) and cell extracts were prepared as explained above in TBS supplemented with 0.5% Tx-100 and protease inhibitors. Membrane lipid strips were blocked in 3% BSA in TBS supplemented with 0.1% Tween-20 (TBS-T) for 1 hr at 4°C. Then, strips

were incubated overnight at 4°C with cleared cell extracts previously diluted 1/10 in TBS-T supplemented with 1% BSA. Strips were incubated first with a pAb against GFP, and then with a secondary HRP-conjugated pAb to detect GFP-constructs bound to lipid dots. The protein-lipid overlay assay was done in duplicate for each condition with very similar results.

#### Reverse dimerization assay

HeLa cells were co-transfected with the Golgi marker GalT-mRFP (not shown in all figures) and G $\alpha$ -Nt<sup>7</sup>-FM<sup>4</sup>-GFP, MGNC-Nt<sup>7</sup>-FM<sup>4</sup>-GFP or GFP-FM<sup>4</sup>-hGH (at a 1:3 plasmid ratio), and seeded on poly-L-lysine-coated coverslips for 15 hr as indicated above. Then, cells were incubated for 2 hr at normal culture conditions in HBSS supplemented with 20 mM HEPES, pH 7.4 and 50  $\mu$ M Cycloheximide to block de novo synthesis of proteins. The reverse dimerization was induced by adding fresh HBSS supplemented as above plus 1  $\mu$ M D/D solubilizer for the time indicated in the corresponding figures. For temperature block of Golgi transport, the last two steps were simultaneously performed at 37°C and 20°C. Then, cells were fixed and prepared for microscopy. Quantification of fluorescence intensity at the MannII-mRFP Golgi region was done as described above. Student's t test was used for statistical analysis of  $\geq 40$  cells per condition and from 3 independent experiments.

For the live imaging of reverse dimerization, HeLa cells were transfected as above but seeded on  $\mu$ -Slide-4-wells coverslips (Ibidi). Cells were first incubated for 30 min at 37°C in Hank's Balanced Salt Solution (HBSS; Gibco) supplemented with 20 mM HEPES, pH 7.4 and 50  $\mu$ M cyclohexamide. Slides were then mounted on a temperature-controlled stage in a VisiScope CSU-X1 spinning disk confocal system (Visitron Systems) equipped with a Plan-Apochromat 63x/1.4 oil objective on an AxioObserver.Z1 microscope (Zeiss), a Evolve 512 EMCCD Camera (Photometrics), and the VisiView Imaging software (Visitron Systems).

Reverse dimerization was induced by adding D/D solubilizer to reach a 1  $\mu$ M final concentration, and cells were immediately recorded at one image per 5 second for 10 min. For analysis, movies were generated from stacks using ImageJ, and the mean fluorescence

intensity of an area at the center of the MannII-mRFP Golgi region was measured from stacks in >10 cells per condition.

#### Palmostatin B treatment

For the live imaging, N2a cells co-expressing the GFP-fusion constructs and the MannII-mRFP Golgi marker were seeded on  $\mu$ -Slide-4-wells coverslips (Ibidi). Cells were first incubated for 30 min at 37°C in HBSS supplemented with 20 mM HEPES, pH 7.4 and 50  $\mu$ M cycloheximide, then Palmostatin B in DMSO was added to a 50  $\mu$ M final concentration, and cells were immediately recorded at one image per 30 second for 45 min in the spinning disk confocal system described above. Same volume of DMSO was added for control cells. PM content and co-localization with MannII-mRFP was done as above. One-way ANOVA test was used for statistical analysis of 20 and  $\geq 16$  cells per condition for PM content and colocalization, respectively.

#### S-palmitoylation at the outer nuclear membrane (SwissKASH assay)

HeLa cells were co-transfected as above with plasmids encoding the GFP-fusion, SUN2, and control mRFP/BFP-KASH or mRFP/BFP-zDHHC-KASH at a 1:3:3 plasmid ratio, at a 1:2:2:1 when GCP16/Golga7-Flag, Golga7b-Flag or His<sub>6</sub>-RGS19 was included, or at 1:2:2:1:1 when mRFP-G $\beta$ 1 and mRFP-G $\gamma$ 3 were co-transfected. Cells were then seeded on poly-L-lysine-coated coverslips, fixed and prepared for microscopy. For quantification, mean GFP-fluorescence intensity at the ONM region labelled by the mRFP-KASH fusion was determined using ImageJ. Simultaneously, GFP-fluorescence was measured at a nearby cytosolic region as well, and the ratio ONM over cytosol was used to define the relative ONM content of each GFP-construct. Ratio values were used due to different expression levels of the GFP-constructs among the cell population. One-way ANOVA or Student's t-test were used for statistical analysis of  $\geq 40$  cells per condition and from at least 3 independent experiments.

### Statistics and reproducibility

Statistical parameters, including the exact values of n are reported in the figure legends. Results in Box plots indicate median (middle line), 25th, 75th percentile (box), and lowest, highest value (whiskers), other data are shown as the mean, and error bars represent the s.e.m. or s.d. as indicated in the corresponding figure legend; ns, not significant, \* $p \leq 0.01$ ; \*\* $p \leq 0.005$ ; \*\*\* $p \leq 0.001$ ; \*\*\*\* $p \leq 0.0001$  using one-way or two-way ANOVA with Tukey's post hoc test (for multi-sample groups), and two-sided unpaired Student's *t*-test or Mann-Whitney U test (for two-sample comparison). GraphPad Prism 9 was used to determine statistical significance. No statistical methods were used to predetermine the sample sizes. All replicates successfully reproduced the presented findings.

### Data availability

The data that support the findings of this study are available from the corresponding authors upon reasonable request. Source data are provided with this paper.

## REFERENCES

1. Hauser, A.S., Attwood, M.M., Rask-Andersen, M., Schioth, H.B. & Gloriam, D.E. Trends in GPCR drug discovery: new agents, targets and indications. *Nat Rev Drug Discov* **16**, 829-842 (2017).
2. Oldham, W.M. & Hamm, H.E. Heterotrimeric G protein activation by G-protein-coupled receptors. *Nat Rev Mol Cell Biol* **9**, 60-71 (2008).
3. Lobingier, B.T. & von Zastrow, M. When trafficking and signaling mix: How subcellular location shapes G protein-coupled receptor activation of heterotrimeric G proteins. *Traffic* **20**, 130-136 (2019).
4. Luini, A. & Parashuraman, S. Signaling at the Golgi: sensing and controlling the membrane fluxes. *Curr Opin Cell Biol* **39**, 37-42 (2016).
5. Solis, G.P. *et al.* Golgi-Resident Galphao Promotes Protrusive Membrane Dynamics. *Cell* **170**, 939-955 e924 (2017).
6. Chen, C.A. & Manning, D.R. Regulation of G proteins by covalent modification. *Oncogene* **20**, 1643-1652 (2001).
7. Farazi, T.A., Waksman, G. & Gordon, J.I. The biology and enzymology of protein N-myristoylation. *J Biol Chem* **276**, 39501-39504 (2001).
8. Linder, M.E. & Deschenes, R.J. New insights into the mechanisms of protein palmitoylation. *Biochemistry* **42**, 4311-4320 (2003).
9. Yuan, M. *et al.* N-myristoylation: from cell biology to translational medicine. *Acta Pharmacol Sin* (2020).
10. Gottlieb, C.D. & Linder, M.E. Structure and function of DHHC protein S-acyltransferases. *Biochem Soc Trans* **45**, 923-928 (2017).
11. Rana, M.S., Lee, C.J. & Banerjee, A. The molecular mechanism of DHHC protein acyltransferases. *Biochem Soc Trans* **47**, 157-167 (2019).
12. Rocks, O. *et al.* The palmitoylation machinery is a spatially organizing system for peripheral membrane proteins. *Cell* **141**, 458-471 (2010).
13. Fukata, M., Sekiya, A., Murakami, T., Yokoi, N. & Fukata, Y. Postsynaptic nanodomains generated by local palmitoylation cycles. *Biochem Soc Trans* **43**, 199-204 (2015).
14. Philippe, J.M. & Jenkins, P.M. Spatial organization of palmitoyl acyl transferases governs substrate localization and function. *Mol Membr Biol* **35**, 60-75 (2019).
15. Mumby, S.M., Heukeroth, R.O., Gordon, J.I. & Gilman, A.G. G-protein alpha-subunit expression, myristoylation, and membrane association in COS cells. *Proc Natl Acad Sci U S A* **87**, 728-732 (1990).
16. Parenti, M., Viganò, M.A., Newman, C.M., Milligan, G. & Magee, A.I. A novel N-terminal motif for palmitoylation of G-protein alpha subunits. *Biochem J* **291 ( Pt 2)**, 349-353 (1993).
17. Grassie, M.A. *et al.* The palmitoylation status of the G-protein G(o)1 alpha regulates its activity of interaction with the plasma membrane. *Biochem J* **302 ( Pt 3)**, 913-920 (1994).
18. Castrec, B. *et al.* Structural and genomic decoding of human and plant myristoylomes reveals a definitive recognition pattern. *Nat Chem Biol* **14**, 671-679 (2018).
19. Wall, M.A. *et al.* The structure of the G protein heterotrimer Gi alpha 1 beta 1 gamma 2. *Cell* **83**, 1047-1058 (1995).
20. Senarath, K. *et al.* Regulation of G Protein betagamma Signaling. *Int Rev Cell Mol Biol* **339**, 133-191 (2018).
21. Xie, Y. *et al.* GPS-Lipid: a robust tool for the prediction of multiple lipid modification sites. *Sci Rep* **6**, 28249 (2016).
22. Kallemeijn, W.W. *et al.* Validation and Invalidation of Chemical Probes for the Human N-myristoyltransferases. *Cell Chem Biol* **26**, 892-900 e894 (2019).
23. Resh, M.D. Trafficking and signaling by fatty-acylated and prenylated proteins. *Nat Chem Biol* **2**, 584-590 (2006).

24. Martinez, A. *et al.* Extent of N-terminal modifications in cytosolic proteins from eukaryotes. *Proteomics* **8**, 2809-2831 (2008).
25. Yeung, T. *et al.* Membrane phosphatidylserine regulates surface charge and protein localization. *Science* **319**, 210-213 (2008).
26. Rusch, M. *et al.* Identification of acyl protein thioesterases 1 and 2 as the cellular targets of the Ras-signaling modulators palmostatin B and M. *Angew Chem Int Ed Engl* **50**, 9838-9842 (2011).
27. Rivera, V.M. *et al.* Regulation of protein secretion through controlled aggregation in the endoplasmic reticulum. *Science* **287**, 826-830 (2000).
28. Matlin, K.S. & Simons, K. Reduced temperature prevents transfer of a membrane glycoprotein to the cell surface but does not prevent terminal glycosylation. *Cell* **34**, 233-243 (1983).
29. Gordon, D.E., Bond, L.M., Sahlender, D.A. & Peden, A.A. A targeted siRNA screen to identify SNAREs required for constitutive secretion in mammalian cells. *Traffic* **11**, 1191-1204 (2010).
30. Harayama, T. & Riezman, H. Understanding the diversity of membrane lipid composition. *Nat Rev Mol Cell Biol* **19**, 281-296 (2018).
31. Lemonidis, K. *et al.* Substrate selectivity in the zDHHC family of S-acyltransferases. *Biochem Soc Trans* **45**, 751-758 (2017).
32. Dowler, S., Kular, G. & Alessi, D.R. Protein lipid overlay assay. *Sci STKE* **2002**, pl6 (2002).
33. Balla, A., Tuymetova, G., Tsiomenko, A., Varnai, P. & Balla, T. A plasma membrane pool of phosphatidylinositol 4-phosphate is generated by phosphatidylinositol 4-kinase type-III alpha: studies with the PH domains of the oxysterol binding protein and FAPP1. *Mol Biol Cell* **16**, 1282-1295 (2005).
34. Ohno, Y., Kihara, A., Sano, T. & Igarashi, Y. Intracellular localization and tissue-specific distribution of human and yeast DHHC cysteine-rich domain-containing proteins. *Biochim Biophys Acta* **1761**, 474-483 (2006).
35. Ernst, A.M. *et al.* S-Palmitoylation Sorts Membrane Cargo for Anterograde Transport in the Golgi. *Dev Cell* **47**, 479-493 e477 (2018).
36. Fukata, M., Fukata, Y., Adesnik, H., Nicoll, R.A. & Brecht, D.S. Identification of PSD-95 palmitoylating enzymes. *Neuron* **44**, 987-996 (2004).
37. Fukata, Y. *et al.* Local palmitoylation cycles define activity-regulated postsynaptic subdomains. *J Cell Biol* **202**, 145-161 (2013).
38. Zaballa, M.E. & van der Goot, F.G. The molecular era of protein S-acylation: spotlight on structure, mechanisms, and dynamics. *Crit Rev Biochem Mol Biol* **53**, 420-451 (2018).
39. Sosa, B.A., Kutay, U. & Schwartz, T.U. Structural insights into LINC complexes. *Curr Opin Struct Biol* **23**, 285-291 (2013).
40. Lemonidis, K., Sanchez-Perez, M.C. & Chamberlain, L.H. Identification of a Novel Sequence Motif Recognized by the Ankyrin Repeat Domain of zDHHC17/13 S-Acyltransferases. *J Biol Chem* **290**, 21939-21950 (2015).
41. Tonn Eisinger, K.R. *et al.* Palmitoylation of caveolin-1 is regulated by the same DHHC acyltransferases that modify steroid hormone receptors. *J Biol Chem* **293**, 15901-15911 (2018).
42. Li, Y., Martin, B.R., Cravatt, B.F. & Hofmann, S.L. DHHC5 protein palmitoylates flotillin-2 and is rapidly degraded on induction of neuronal differentiation in cultured cells. *J Biol Chem* **287**, 523-530 (2012).
43. Salaun, C., Locatelli, C., Zmuda, F., Cabrera Gonzalez, J. & Chamberlain, L.H. Accessory proteins of the zDHHC family of S-acylation enzymes. *J Cell Sci* **133** (2020).
44. Ko, P.J. *et al.* A ZDHHC5-GOLGA7 Protein Acyltransferase Complex Promotes Nonapoptotic Cell Death. *Cell Chem Biol* **26**, 1716-1724 e1719 (2019).

45. Swarthout, J.T. *et al.* DHHC9 and GCP16 constitute a human protein fatty acyltransferase with specificity for H- and N-Ras. *J Biol Chem* **280**, 31141-31148 (2005).
46. Woodley, K.T. & Collins, M.O. S-acylated Golga7b stabilises DHHC5 at the plasma membrane to regulate cell adhesion. *EMBO Rep* **20**, e47472 (2019).
47. Lakkaraju, A.K. *et al.* Palmitoylated calnexin is a key component of the ribosome-translocon complex. *EMBO J* **31**, 1823-1835 (2012).
48. Lin, C. *et al.* Double suppression of the Galpha protein activity by RGS proteins. *Mol Cell* **53**, 663-671 (2014).
49. Stow, J.L. *et al.* A heterotrimeric G protein, G alpha i-3, on Golgi membranes regulates the secretion of a heparan sulfate proteoglycan in LLC-PK1 epithelial cells. *J Cell Biol* **114**, 1113-1124 (1991).
50. Wedegaertner, P.B. G protein trafficking. *Subcell Biochem* **63**, 193-223 (2012).
51. Abrami, L. *et al.* Palmitoylated acyl protein thioesterase APT2 deforms membranes to extract substrate acyl chains. *Nat Chem Biol* **17**, 438-447 (2021).
52. Ernst, A.M., Toomre, D. & Bogan, J.S. Acylation - A New Means to Control Traffic Through the Golgi. *Front Cell Dev Biol* **7**, 109 (2019).
53. Rodenburg, R.N.P. *et al.* Stochastic palmitoylation of accessible cysteines in membrane proteins revealed by native mass spectrometry. *Nat Commun* **8**, 1280 (2017).
54. Bannan, B.A. *et al.* The Drosophila protein palmitoylome: characterizing palmitoylthioesterases and DHHC palmitoyl-transferases. *Fly (Austin)* **2**, 198-214 (2008).
55. Woodley, K.T. & Collins, M.O. Regulation and function of the palmitoyl-acyltransferase ZDHHC5. *FEBS J* (2021).
56. Rana, M.S. *et al.* Fatty acyl recognition and transfer by an integral membrane S-acyltransferase. *Science* **359** (2018).
57. Tsutsumi, R. *et al.* Identification of G protein alpha subunit-palmitoylating enzyme. *Mol Cell Biol* **29**, 435-447 (2009).
58. Solis, G.P. *et al.* Reggies/flotillins interact with Rab11a and SNX4 at the tubulovesicular recycling compartment and function in transferrin receptor and E-cadherin trafficking. *Mol Biol Cell* **24**, 2689-2702 (2013).
59. Kosloff, M., Elia, N. & Selinger, Z. Structural homology discloses a bifunctional structural motif at the N-termini of G alpha proteins. *Biochemistry* **41**, 14518-14523 (2002).
60. Chen, B., Sun, Y., Niu, J., Jarugumilli, G.K. & Wu, X. Protein Lipidation in Cell Signaling and Diseases: Function, Regulation, and Therapeutic Opportunities. *Cell Chem Biol* **25**, 817-831 (2018).
61. Fung, T.S. & Liu, D.X. Post-translational modifications of coronavirus proteins: roles and function. *Future Virol* **13**, 405-430 (2018).
62. Ko, P.J. & Dixon, S.J. Protein palmitoylation and cancer. *EMBO Rep* **19** (2018).
63. Thaler, C., Koushik, S.V., Blank, P.S. & Vogel, S.S. Quantitative multiphoton spectral imaging and its use for measuring resonance energy transfer. *Biophys J* **89**, 2736-2749 (2005).
64. Subach, O.M., Cranfill, P.J., Davidson, M.W. & Verkhusha, V.V. An enhanced monomeric blue fluorescent protein with the high chemical stability of the chromophore. *PLoS One* **6**, e28674 (2011).
65. Espigat-Georger, A., Dyachuk, V., Chemin, C., Emorine, L. & Merdes, A. Nuclear alignment in myotubes requires centrosome proteins recruited by nesprin-1. *J Cell Sci* **129**, 4227-4237 (2016).
66. Turgay, Y. *et al.* SUN proteins facilitate the removal of membranes from chromatin during nuclear envelope breakdown. *J Cell Biol* **204**, 1099-1109 (2014).
67. Tian, H. *et al.* Systematic siRNA Screen Unmasks NSCLC Growth Dependence by Palmitoyltransferase DHHC5. *Mol Cancer Res* **13**, 784-794 (2015).
68. Solis, G.P. *et al.* Reggie/flotillin proteins are organized into stable tetramers in membrane microdomains. *Biochem J* **403**, 313-322 (2007).



69. Kuster, A. *et al.* The Q-soluble N-Ethylmaleimide-sensitive Factor Attachment Protein Receptor (Q-SNARE) SNAP-47 Regulates Trafficking of Selected Vesicle-associated Membrane Proteins (VAMPs). *J Biol Chem* **290**, 28056-28069 (2015).
70. Katoh, Y., Nozaki, S., Hartanto, D., Miyano, R. & Nakayama, K. Architectures of multisubunit complexes revealed by a visible immunoprecipitation assay using fluorescent fusion proteins. *J Cell Sci* **128**, 2351-2362 (2015).

## **ACKNOWLEDGEMENTS**

The work was supported with the Swiss National Science Foundation grants 31003A\_175658 to V.L.K and 310030\_192608 to F.G.V.D.G. We would like to thank Sabina Troccaz for the excellent technical assistance and members of the Bioimaging core facility of the CMU for assistance in microscopy.

## **AUTHOR CONTRIBUTIONS**

G.P.S. performed and analyzed experiments, and developed the methodologies. A.K. performed and quantified the Palmostain B live imaging. J.V. assisted with protein structural analysis and molecular cloning. L.A. performed and analyzed [<sup>3</sup>H]palmitate metabolic labelling. C.A. assisted with interpretation of results. F.G.V.D.G. analyzed [<sup>3</sup>H]palmitate metabolic labelling. G.P.S. and V.L.K. designed the work and wrote the paper. All authors reviewed the manuscript.

## **COMPETING INTERESTS**

The authors declare no competing interests.

## FIGURE LEGENDS

### Figure 1. Key amino acid residues in Gao N-terminus

**a**, Amino acid sequence of the GFP-fusions of Gao N-terminus. **b-f**, Confocal images of N2a cells expressing full-length Gao-GFP (**b**), Gao-Nt<sup>7</sup>-GFP (**c**) or Gao-Nt<sup>31</sup>-GFP (**d**) and immunostained against GM130 as Golgi marker. Color-channels are listed vertically top-to-bottom and selected areas are magnified to the right with the channels displayed vertically in the same order. DAPI in blue marks nuclei. Quantification of mean fluorescence intensity ratios of GFP-fusions at the Golgi (**e**) or PM (**f**) versus total cell. Box plots indicate median (middle line), 25th, 75th percentile (box), and lowest, highest value (whiskers) from 4 independent experiments (Gao-Nt<sup>7</sup>,  $n=56$ ; Gao-Nt<sup>31</sup>,  $n=61$ ; Gao,  $n=58$ ). **g,h**, Western blot of a crude subcellular fractionation of N2a cells expressing the constructs described in (**b-d**). Ab against GFP was used for detection of Gao constructs, and against GAPDH and flotillin-2 (Flot-2) as cytosolic (Cyto) and membrane (Mem) markers, respectively (**g**). Quantification of the relative distribution of GFP-fusions in cytosolic and membrane fractions (**h**). Data shown as the mean  $\pm$  s.e.m. from 6 independent experiments. **i,j**, Images of N2a cells expressing the mutants Gao-G2L-Nt<sup>7</sup>-GFP (**i**) or Gao-C3N-Nt<sup>7</sup>-GFP (**j**) and immunostained against GM130 (not showed in **i**). Selected region is zoomed-in with DAPI in blue. **k,l**, Crude fractionation of N2a cells expressing Gao-Nt<sup>7</sup>-GFP or the Nt<sup>7</sup>-GFP mutants indicated in the figure (**k**). Underlined letters indicate residues substituted in Gao-Nt<sup>7</sup>. Western blots done as in (**g**). Relative distribution of GFP-fusions in the cytosolic and membrane fractions (**l**). Data shown as the mean  $\pm$  s.e.m. from 4-6 independent experiments. **m,n**, Localization of Gao-Nt<sup>7</sup>-GFP in N2a cells under inhibition of N-myristoylation (DDD85646; **m**) or S-palmitoylation (2-bromopalmitate; 2-BrPal; **n**). **o-q**, Localization in N2a cells of mutants of the Serine at position 6 (S6) in Gao-Nt<sup>7</sup>-GFP under normal conditions (**o**) or inhibition of N-myristoylation (**p**). The Ser-to-Cys (S6C) mutant showed a higher targeting to the PM, quantified in (**q**). Box plots indicate median (middle line), 25th, 75th percentile (box), and lowest, highest value

(whiskers) from 4 independent experiments (Gao-Nt<sup>7</sup>, *n*=56; S6C, *n*=63). **b-d,i,j,m,n,o,p**, scale bars, 10 μm. See also Supplementary Fig. 1.

## Figure 2. Position of the Cys in Gao N-terminus

**a-d**, Confocal images of N2a cells expressing the Nt<sup>7</sup>-GFP mutants MGNC (**a**) or MGNTC (**b**) and immunostained against GM130 (**a,b**). Nuclei in blue stained with DAPI. Color-channels are listed vertically top-to-bottom and selected areas are magnified to the right with the channels displayed vertically in the same order. Underlined letters indicate residues substituted in Gao-Nt<sup>7</sup>. Quantification of mean fluorescence intensity ratios of GFP-fusions at the PM versus total cell (**c**) from 4 independent experiments (Gao-Nt<sup>7</sup>, *n*=56; MGNC-Nt<sup>7</sup>, *n*=50; Gao, *n*=58). Co-localization analysis of the Nt<sup>7</sup>-GFP constructs with GM130 (**d**) from 3 independent experiments (Gao-Nt<sup>7</sup>, *n*=33; MGNC-Nt<sup>7</sup>, *n*=36; MGNTC-Nt<sup>7</sup>, *n*=39). **e-g**, Image of N2a cells expressing the MGNC mutant of full-length Gao (MGNC-Gao-GFP) and immunostained against GM130 (**e**). DAPI staining in blue. Boxed area is enlarged. Underlined letters indicate residues substituted in Gao. Relative localization of GFP-fusions at the PM (**f**) from 4 independent experiments (Gao, *n*=56; MGNC-Gao, *n*=46; MGNC-Nt<sup>7</sup>, *n*=50). Co-localization with GM130 (**g**) from 3 independent experiments (Gao, *n*=47; MGNC-Gao, *n*=38; MGNTC-Nt<sup>7</sup>, *n*=36). **h**, N2a cells expressing the Nt<sup>7</sup>-GFP construct with the consensus sequence of eukaryotic Ga-Nt<sup>7</sup> carrying a Cys at position 5 (MGS<sup>7</sup>LC<sup>7</sup>SR). Marked region is magnified. Nucleus stained in blue with DAPI. **i-k**, Localization of Gao-Nt<sup>7</sup>-GFP (**i**), MGNC-Nt<sup>7</sup>-GFP (**j**) and MGS<sup>7</sup>LC<sup>7</sup>SR-Nt<sup>7</sup>-GFP (**k**) in *Drosophila* S2 cells. Co-expression of GalT-mRFP labels Golgi stacks (**i-k**). Selected areas are zoomed-in to the right. **l-n**, Live imaging of N2a cells co-expressing Gao-Nt<sup>7</sup>-GFP (**l**) or MGNC-Nt<sup>7</sup>-GFP (**m**) and the Golgi marker MannII-mRFP (bottom right insets). Representative images at the time of Palmostatin B (PalmB) addition (0 min) and after 45 min. Co-localization of Nt<sup>7</sup>-GFP constructs with MannII-mRFP in 5 min intervals and starting at t=0 (**n**). Data represent mean ± s.d. (Gao-Nt<sup>7</sup> control, *n*=20; Gao-Nt<sup>7</sup> PalmB, *n*=20; MGNC-Nt<sup>7</sup> control, *n*=16; MGNC-Nt<sup>7</sup> PalmB, *n*=20). **a,b,e,h,i,m**, scale bars, 10 μm; **i-k**, scale bars, 5 μm. **c,d,f,g**, Box plots indicate median

(middle line), 25th, 75th percentile (box), and lowest, highest value (whiskers). See also Supplementary Fig. 1 and 2, Supplementary Notes, Supplementary Tables 1 and 2, and Supplementary Movies 1 and 2.

### Figure 3. Targeting of Nt<sup>7</sup>-GFP

**a,b**, Reverse dimerization (RD) assay in HeLa expressing Gao-Nt<sup>7</sup>-FM<sup>4</sup>-GFP (**a**) or MGNC-Nt<sup>7</sup>-FM<sup>4</sup>-GFP (**b**). Cytosolic clusters formed by the Nt<sup>7</sup>-FM<sup>4</sup>-GFP constructs dissolve by the addition of D/D solubilizer (D/D-Sol) and show their expected localizations. Underlined letters indicate residues substituted in Gao-Nt<sup>7</sup>. **c-e**, Live imaging of HeLa cells co-expressing Gao-Nt<sup>7</sup>-FM<sup>4</sup>-GFP (**c**) or MGNC-Nt<sup>7</sup>-FM<sup>4</sup>-GFP (**d**) and the Golgi marker MannII-mRFP (bottom right insets). Representative images of the Nt<sup>7</sup>-FM<sup>4</sup>-GFP constructs at the time of D/D solubilizer addition (0 min) and after 6 min (**c,d**). Relative increase upon time of Nt<sup>7</sup>-FM<sup>4</sup>-GFP constructs at the Golgi region (**e**). Note that Gao-Nt<sup>7</sup>-FM<sup>4</sup>-GFP quickly targets the Golgi region, while MGNC-Nt<sup>7</sup>-FM<sup>4</sup>-GFP only slightly accumulates at the Golgi. Data represent mean  $\pm$  s.d. (Gao-Nt<sup>7</sup>,  $n=12$ ; MGNC-Nt<sup>7</sup>,  $n=11$ ). **f-h**, RD assay in HeLa cells expressing the secretable control GFP-FM<sup>4</sup>-hGH (**f**) or MGNC-Nt<sup>7</sup>-FM<sup>4</sup>-GFP (**g**) performed at 37°C or at 20°C to inhibit Golgi transport. Incubation with D/D solubilizer results in the almost complete secretion of GFP-FM<sup>4</sup>-hGH at 37°C but in a Golgi retention at 20°C (**f**). PM targeting of MGNC-Nt<sup>7</sup>-FM<sup>4</sup>-GFP seems not affected by the 20°C temperature block and its presence at the Golgi region (MannII-mRFP) is not higher than at 37°C (**g**). Quantification of mean fluorescence intensity of MGNC-Nt<sup>7</sup>-FM<sup>4</sup>-GFP, Golgi over total cell (**h**). Box plots indicate median (middle line), 25th, 75th percentile (box), and lowest, highest value (whiskers) from 3 independent experiments (37°C,  $n=49$ ; 20°C,  $n=40$ ). **a-d,f,g**, scale bars, 10  $\mu$ m. See also Supplementary Figure 2, and Supplementary Movies 3 and 4.

### Figure 4. Local S-palmitoylation at the ONM – the “SwissKASH” assay

**a**, Schematic representation of the core components of the SwissKASH assay. **b-e** Representative images of HeLa cells expressing the constructs mRFP-KASH that targets the

ONM (**b**), mRFP-zDHHC5 (**c**) or mRFP-zDHHC5-KASH (**d,e**) with or without the co-expression of SUN2. Note that mRFP-zDHHC5-KASH efficiently targets the ONM in the presence of SUN2 (**e**). **b-e**, scale bars, 10  $\mu$ m. See also Supplementary Figures 3 and 4.

### Figure 5. The SwissKASH assay for PM and Golgi zDHHCs

**a-e**, Representative images of the SwissKASH assay in HeLa cells for Gao-Nt<sup>7</sup>-GFP (**a,b**) and MGNC-Nt<sup>7</sup>-GFP (**c,d**) using the control mRFP-KASH construct (**a,c**) or mRFP-zDHHC11-KASH (**b,d**). Nuclei stained in blue with DAPI. Color-channels are listed vertically top-to-bottom and selected areas are magnified to the right with the channels displayed also vertically in the same order. Underlined letters indicate residues substituted in Gao-Nt<sup>7</sup>. Note that the expression of the KASH-construct carrying zDHHC11 results in the strong recruitment of Gao-Nt<sup>7</sup>-GFP (**b**) and MGNC-Nt<sup>7</sup>-GFP (**d**) at the ONM, effect not seen by mRFP-KASH (**a,c**). Quantification of mean fluorescence intensity ratios of GFP-fusions at the ONM versus cytosol (**e**). Box plots indicate median (middle line), 25th, 75th percentile (box), and lowest, highest value (whiskers) from 3 independent experiments (Gao-Nt<sup>7</sup> and mRFP-KASH,  $n=44$ ; Gao-Nt<sup>7</sup> and zDHHC11,  $n=45$ ; MGNTC-Nt<sup>7</sup> and mRFP-KASH,  $n=49$ ; MGNTC-Nt<sup>7</sup> and zDHHC11,  $n=43$ ). **h-m**, The SwissKASH assay using zDHHC3 (**f,h**) and zDHHC7 (**g,i**). Gao-Nt<sup>7</sup>-GFP efficiently targets the ONM by the co-expression of mRFP-zDHHC3-KASH (**f**) and mRFP-zDHHC7-KASH (**g**). MGNC-Nt<sup>7</sup>-GFP poorly localizes at the ONM in the presence of mRFP-zDHHC3-KASH (**h**) and mRFP-zDHHC7-KASH (**i**). DAPI stained nuclei in blue and selected areas are magnified to the right. Quantification of mean fluorescence intensity ratios of GFP-fusions at the ONM versus cytosol by zDHHC3 (**j**) and zDHHC7 (**k**). Box plots indicate median (middle line), 25th, 75th percentile (box), and lowest, highest value (whiskers) from 3 independent experiments (Gao-Nt<sup>7</sup> and mRFP-KASH,  $n=44$ ; Gao-Nt<sup>7</sup> and zDHHC3,  $n=50$ ; Gao-Nt<sup>7</sup> and zDHHC7,  $n=46$ ; MGNTC-Nt<sup>7</sup> and mRFP-KASH,  $n=49$ ; MGNTC-Nt<sup>7</sup> and zDHHC3,  $n=53$ ; MGNTC-Nt<sup>7</sup> and zDHHC7,  $n=45$ ). **l-o**, ONM recruitment of Gao-Nt<sup>7</sup>-GFP is not observed in the SwissKASH assay using the inactive DHHS-mutants for zDHHC3 (zDHHS3; **l**), zDHHC7 (zDHHS7; **m**), and zDHHC11 (zDHHS11; **n**). The zDHHS11

mutant shows no ONM recruitment of MGNC-Nt<sup>7</sup>-GFP (**o**). Boxed areas are zoomed-in to the right, and DAPI labeling nuclei in blue. **a-d,f-i,l-o**, scale bars, 10  $\mu$ m. See also Supplementary Figures 3-6.

## Figure 6. The zDHHC5-Golga7b complex

**a-d**, The SwissKASH assay for G $\alpha$ -Nt<sup>7</sup>-GFP (**a**) and MGNC-Nt<sup>7</sup>-GFP (**b**) using mRFP-zDHHC5-KASH and Golga7b-Flag in HeLa cells. Note that the KASH-fusion of zDHHC5 induces the ONM recruitment of MGNC-Nt<sup>7</sup>-GFP (**b**) and Golga7b (**a,b**), but not of G $\alpha$ -Nt<sup>7</sup>-GFP (**a**). ONM recruitment of MGNC-Nt<sup>7</sup>-GFP and Golga7b is not induced by the inactive DHHS-mutant of zDHHC5 (zDHHS5; **c**). Cells were immunostained against Flag-tag and nuclei were stained in blue with DAPI. Marked regions are magnified at the bottom panels. Underlined letters indicate residues substituted in G $\alpha$ -Nt<sup>7</sup>. Quantification of mean fluorescence intensity ratios of GFP-fusions at the ONM versus cytosol (**d**). Box plots indicate median (middle line), 25th, 75th percentile (box), and lowest, highest value (whiskers) from 3 independent experiments (G $\alpha$ -Nt<sup>7</sup> and mRFP-KASH,  $n=44$ ; G $\alpha$ -Nt<sup>7</sup> and zDHHC5-Golga7b,  $n=49$ ; MGNC-Nt<sup>7</sup> and mRFP-KASH,  $n=49$ ; MGNC-Nt<sup>7</sup> and zDHHC5-Golga7b,  $n=48$ ). **e-i**, The SwissKASH assay for G $\alpha$ -Nt<sup>31</sup>-GFP using the control mRFP-KASH (**e**), zDHHC3 (**f**), zDHHC7 (**g**), and zDHHC11 (**h**). DAPI stained nuclei in blue. Color-channels are listed vertically top-to-bottom and selected areas are magnified to the right with the channels displayed also vertically in the same order. Quantification of mean fluorescence intensity ratio (ONM versus cytosol) of G $\alpha$ -Nt<sup>31</sup>-GFP compared to G $\alpha$ -Nt<sup>7</sup>-GFP (**i**). Box plots indicate median (middle line), 25th, 75th percentile (box), and lowest, highest value (whiskers) from 3 independent experiments (For G $\alpha$ -Nt<sup>7</sup>: mRFP-KASH,  $n=44$ ; zDHHC3,  $n=50$ ; zDHHC7,  $n=46$ ; zDHHC11,  $n=47$ . For G $\alpha$ -Nt<sup>31</sup>: mRFP-KASH,  $n=42$ ; zDHHC3,  $n=45$ ; zDHHC7,  $n=40$ ; zDHHC11,  $n=46$ ). **a-c,e-h**, scale bars, 10  $\mu$ m. See also Supplementary Figure 7.

### Figure 7. zDHHC expression levels drive Nt<sup>7</sup> compartmentalization

**a-d**, Representative images of N2a cells expressing Gao-Nt<sup>7</sup>-GFP (**a,b**) together with HA-zDHHC11 (**a**) or its inactive DHHS-mutants (HA-DHHS11; **b**). Golgi was labelled by the co-expression of MannII-BFP and HA-tagged zDHHCs were immunostained against HA (**a,b**). Color-channels are listed vertically top-to-bottom and selected areas are magnified with the channels displayed horizontally in the same order left-to-right. Quantification of mean fluorescence intensity ratio of Gao-Nt<sup>7</sup>-GFP at the PM versus total cell (**c**), and co-localization with MannII-BFP (**d**). Box plots indicate median (middle line), 25th, 75th percentile (box), and lowest, highest value (whiskers) from 3 independent experiments (For **c**: Control,  $n=58$ ; zDHHC11,  $n=61$ ; zDHHS11,  $n=54$ . For **d**: Control,  $n=51$ ; zDHHC11,  $n=53$ ; zDHHS11,  $n=53$ ). **e-l**, N2a cells expressing MGNC-Nt<sup>7</sup>-GFP (**e,f,i,j**) together with HA-zDHHC3 (**e**), HA-zDHHS3 (**f**), HA-zDHHC7 (**i**), or HA-DHHS7 (**j**). Underlined letters indicate residues substituted in Gao-Nt<sup>7</sup>. Quantification of mean fluorescence intensity ratio of MGNC-Nt<sup>7</sup>-GFP at the PM versus total cell (**g,k**), and co-localization with MannII-BFP (**h,l**). Box plots indicate median (middle line), 25th, 75th percentile (box), and lowest, highest value (whiskers) from 3 independent experiments (For **g** and **k**: Control,  $n=56$ ; zDHHC3,  $n=53$ ; zDHHS3,  $n=56$ ; zDHHC7,  $n=54$ ; zDHHS7,  $n=52$ . For **h** and **l**: Control,  $n=54$ ; zDHHC3,  $n=53$ ; zDHHS3,  $n=51$ ; zDHHC7,  $n=52$ ; zDHHS7,  $n=55$ ). **a,b,e,f,i,j**, scale bars, 10  $\mu$ m. See also Supplementary Figure 8.

### Figure 8. Downregulation of zDHHCs affects Nt<sup>7</sup> compartmentalization

**a-g**, Representative images of HeLa cells expressing Gao-Nt<sup>7</sup>-GFP (**a-c**) or MGNC-Nt<sup>7</sup>-GFP (**d-f**). Cells were previously transfected with control siRNA (siControl; **a,d**), siRNAs against zDHHC3 and 7 (siD3 + siD7; **b,e**), or against zDHHC5 and 11 (siD5 + siD11; **c,f**). Cells were immunostained against GM130 to mark the Golgi, and nuclei were stained with DAPI in blue. Color-channels are listed vertically top-to-bottom and selected areas are magnified with the channels displayed horizontally in the same order left-to-right. Underlined letters indicate



residues substituted in Gao-Nt<sup>7</sup>. Quantification of mean fluorescence intensity ratios of GFP-constructs at the Golgi vs total cell (**g**). Box plots indicate median (middle line), 25th, 75th percentile (box), and lowest, highest value (whiskers) from 3 independent experiments (For Gao-Nt<sup>7</sup> (**a-c**): siControl, *n*=57; siD3+siD7, *n*=57; siD5+siD11, *n*=60. For MGNC-Nt<sup>7</sup> (**d-f**): siControl, *n*=55; siD3+siD7, *n*=58; siD5+siD11, *n*=57). **a-f**, scale bars, 10 μm. See also Supplementary Figure 9.

### Figure 9. Targeting of full-length Gao to the ONM

**a-d**, The SwissKASH assay for full-length Gao (Gao-GFP) using the control mRFP-KASH (**a**), zDHHC3 (**b**), zDHHC7 (**c**) and zDHHC11 (**d**) in HeLa cells. Nuclei stained in blue with DAPI. Color-channels are listed vertically top-to-bottom and selected areas are magnified to the right with the channels displayed also vertically in the same order. Note that the ONM accumulation of Gao-GFP is induced by all zDHHCs but not the control mRFP-KASH. **e,f**, The full-length Gao-GFP (**e**) and its MGNC mutant (MGNC-Gao-GFP; **f**) were tested in the SwissKASH system using mRFP-zDHHC5-KASH and Golga7b-Flag. Cells were immunostained against Flag-tag and DAPI stained nuclei in blue. Marked regions are magnified at the bottom panels. Underlined letters indicate residues substituted in the Nt<sup>7</sup> region of Gao. Note that only MGNC-Gao-GFP (**f**) and Golga7b (**e,f**) accumulate at the ONM. **g,h**, The SwissKASH assay applied to Gao-GFP (**g**) and its GTPase-inactive mutant Q205L (**h**) together with mRFP-Gβ1γ3 (**g**) or His<sub>6</sub>-tagged RGS19 (His-RS19; **h**), and using BFP-zDHHC11-KASH (not shown). Cells were immunostained against the His<sub>6</sub>-tag (**h**). Selected areas are magnified at the bottom panels. **a-h**, Scale bars, 10 μm. See also Supplementary Figures 9 and 10.

### Figure 10. Model of compartmentalization of PMPs via local S-palmitoylation

Model of how some peripheral membrane proteins might achieve specific subcellular compartmentalization by the interplay of the substrate selectivity of different zDHHCs. The model uses Gao-Nt<sup>7</sup>-GFP (green circles) and MGNC-Nt<sup>7</sup>-GFP (cyan circles) as examples.

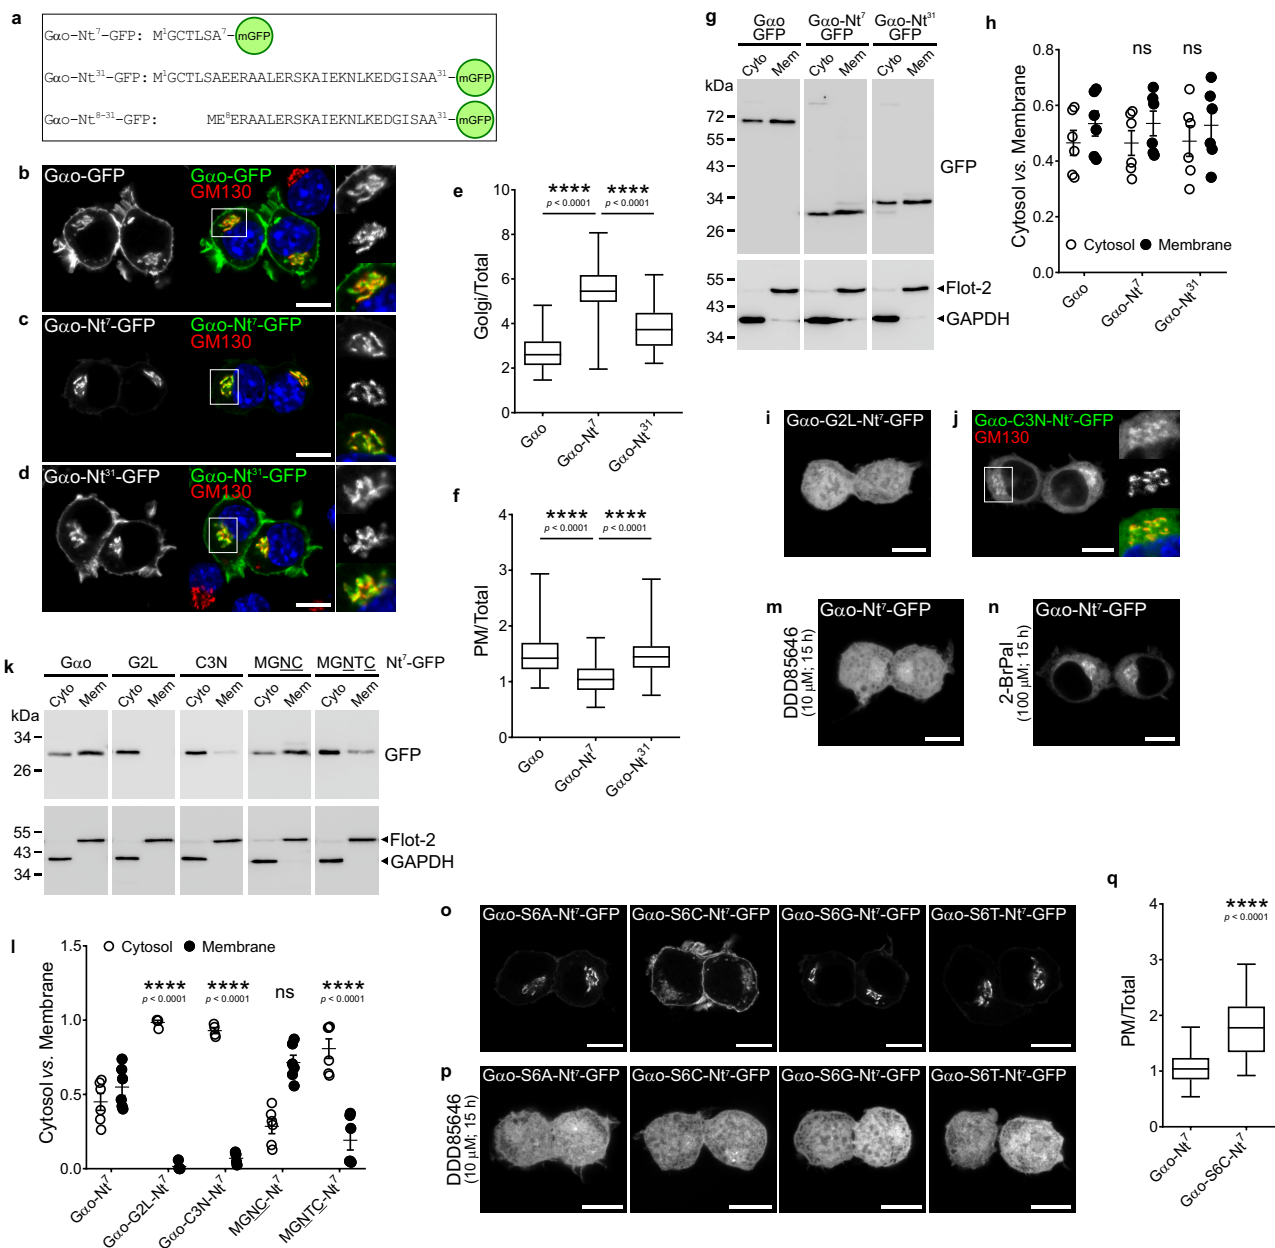

Figure 1\_Solis et al.

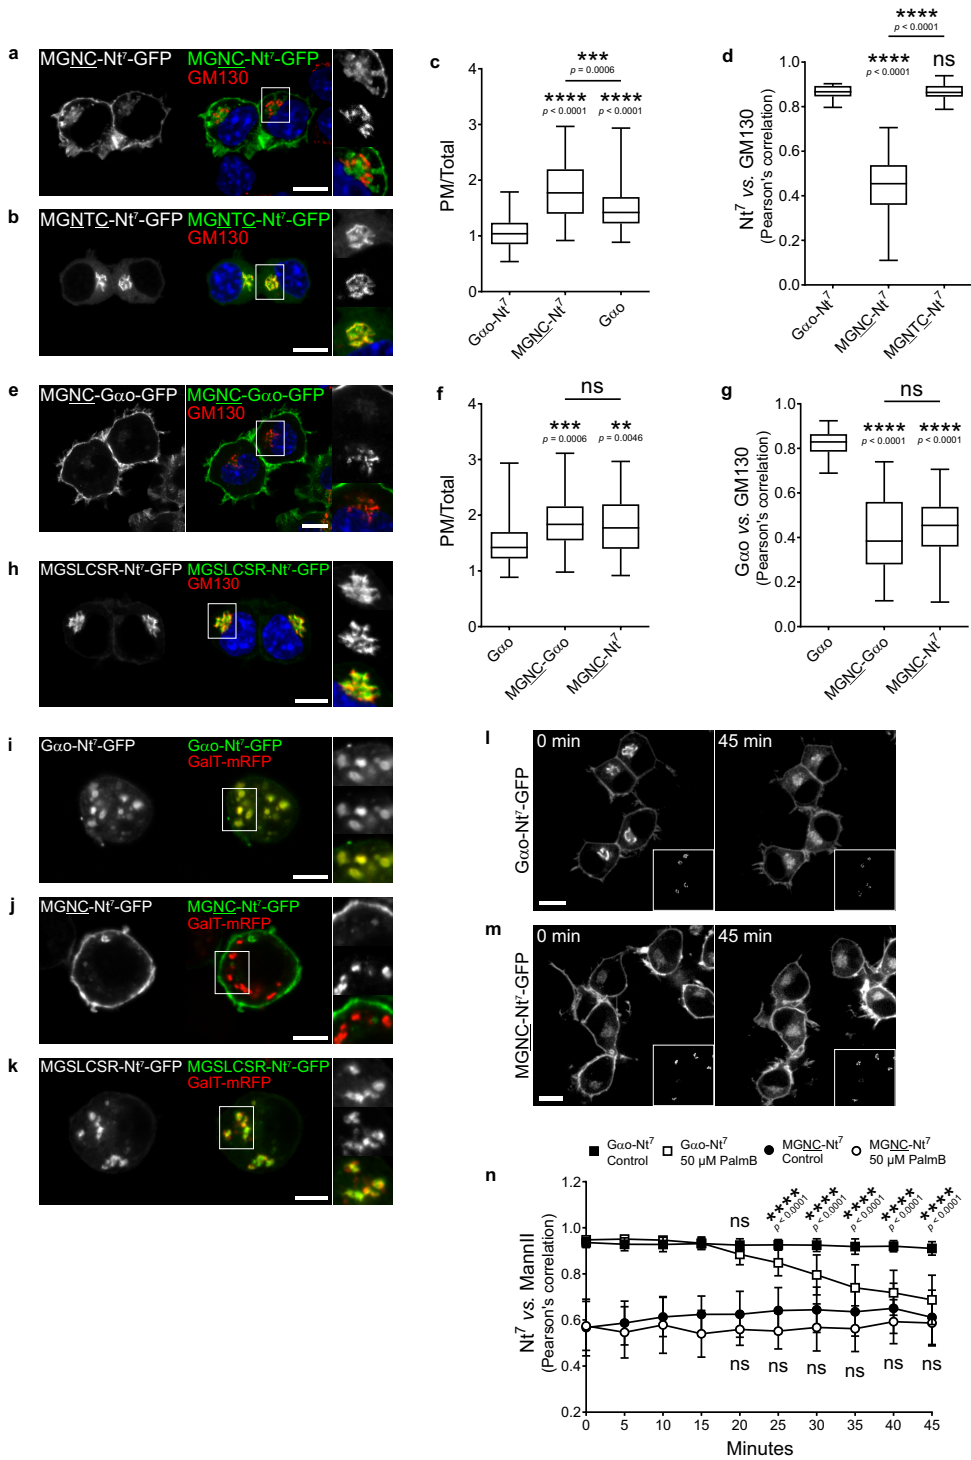

Figure 2\_Solis et al.

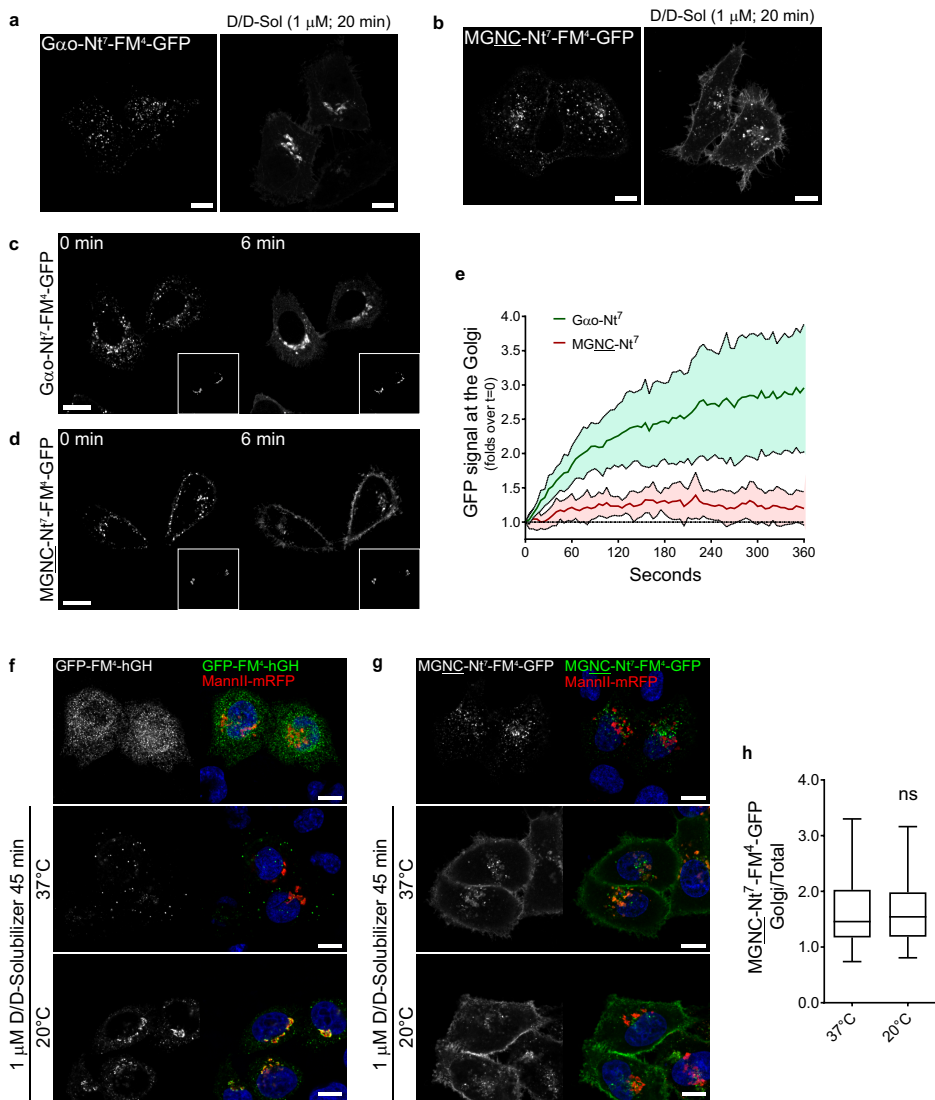

Figure 3\_Solis et al.

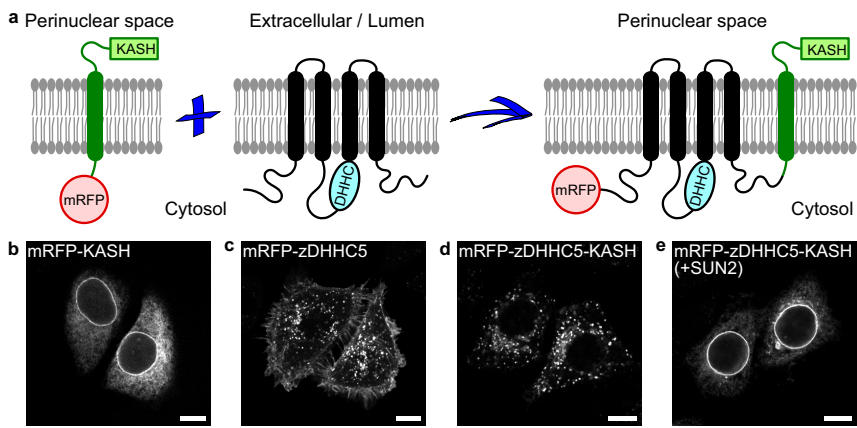

Figure 4\_Solis et al.

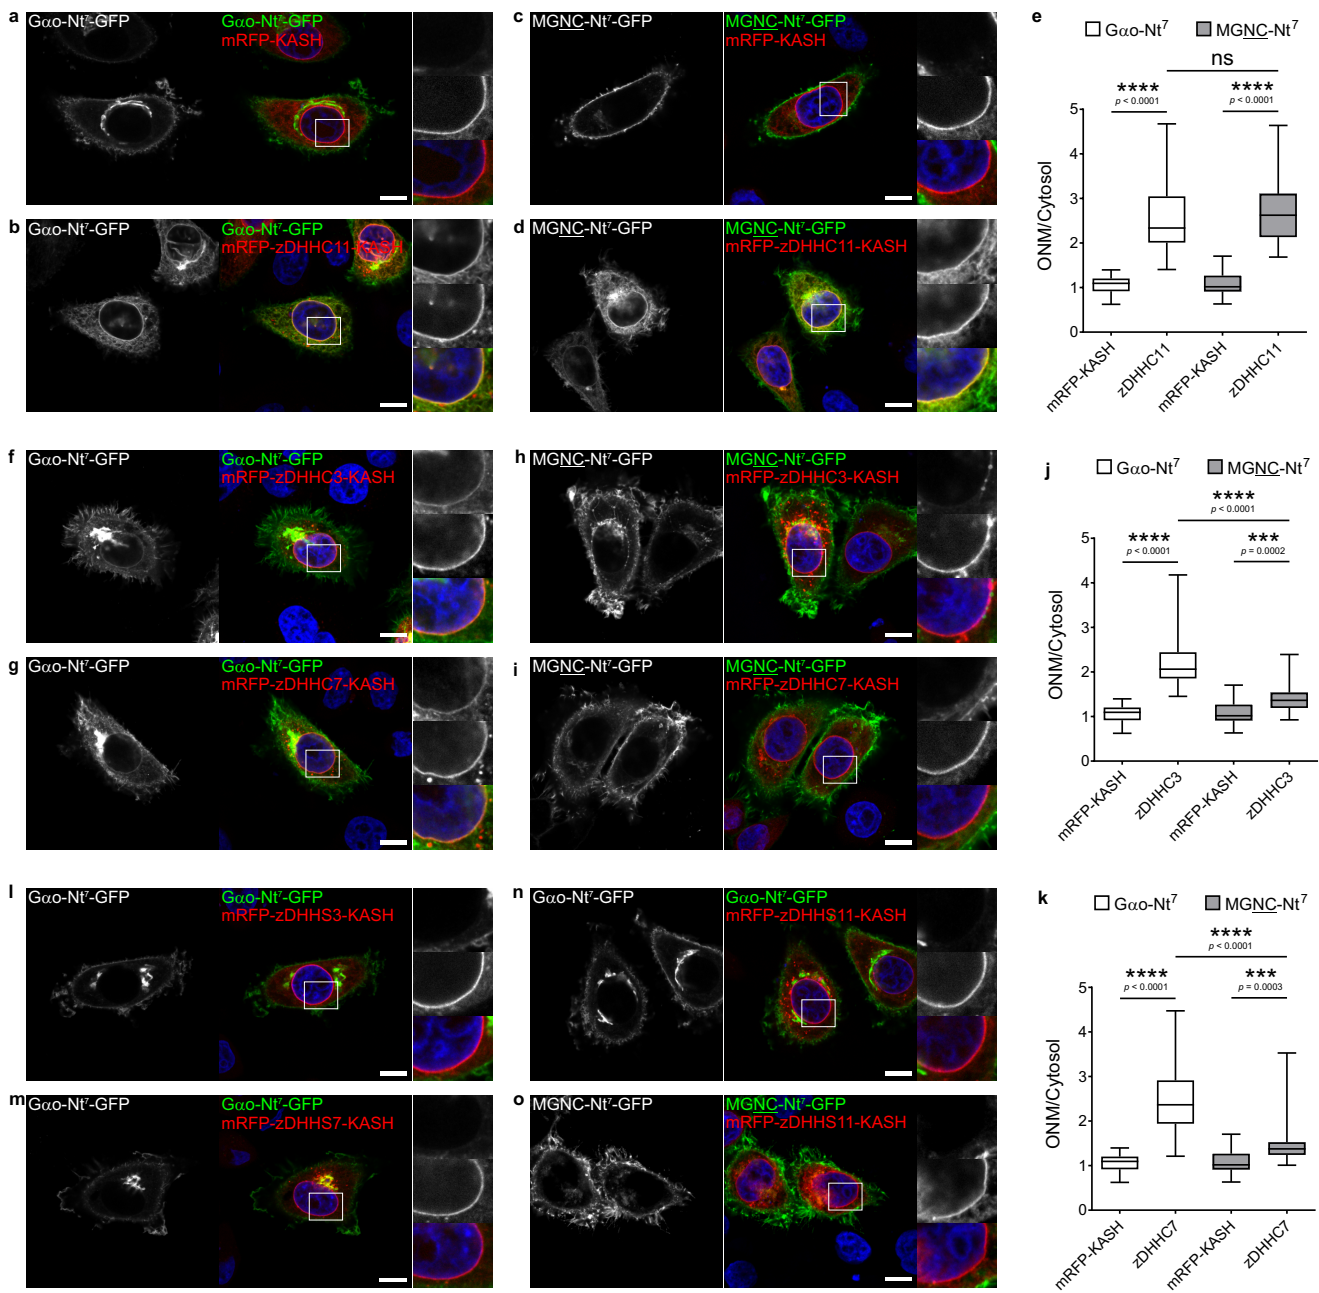

Figure 5\_Solis et al.

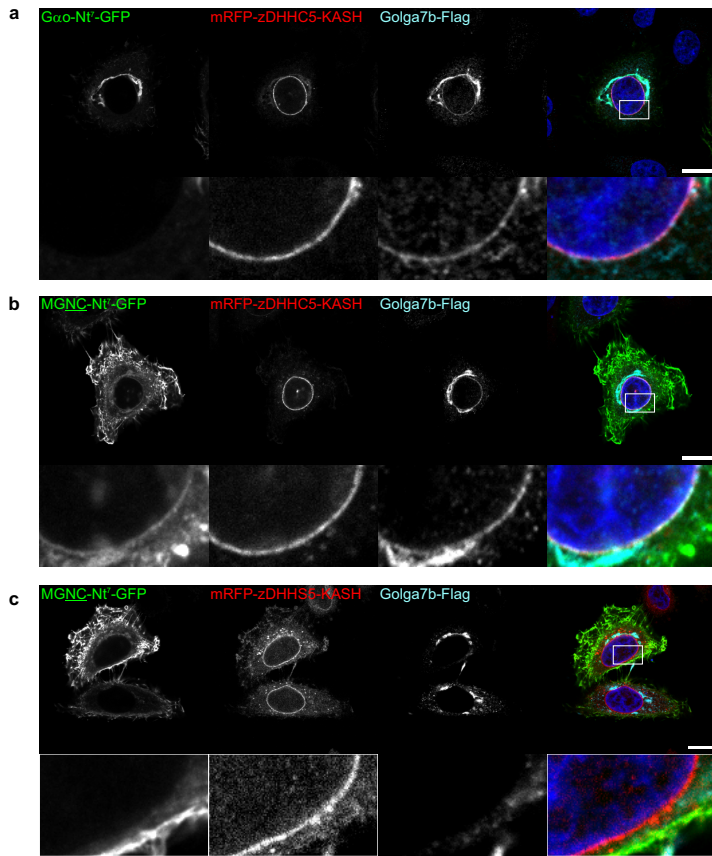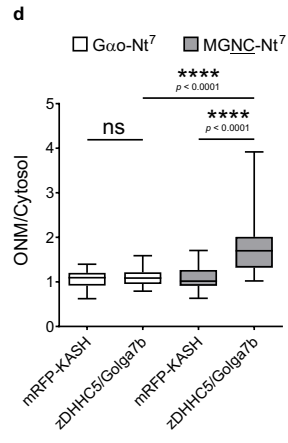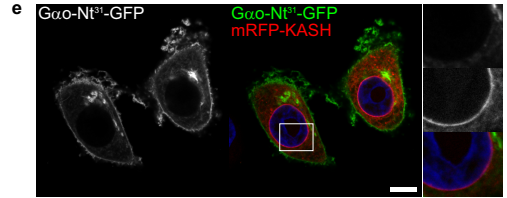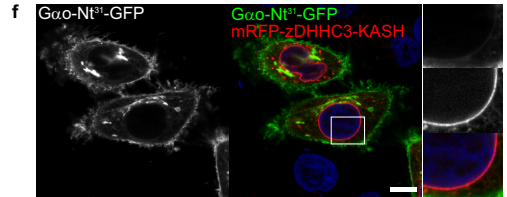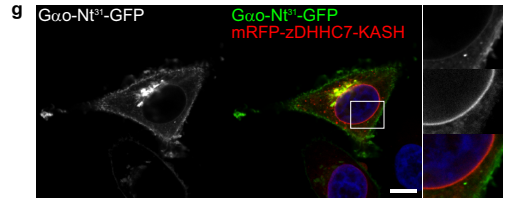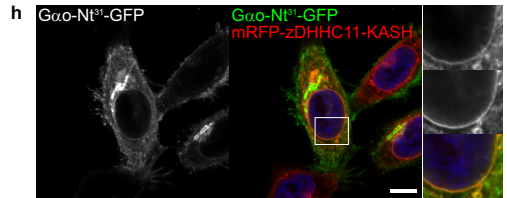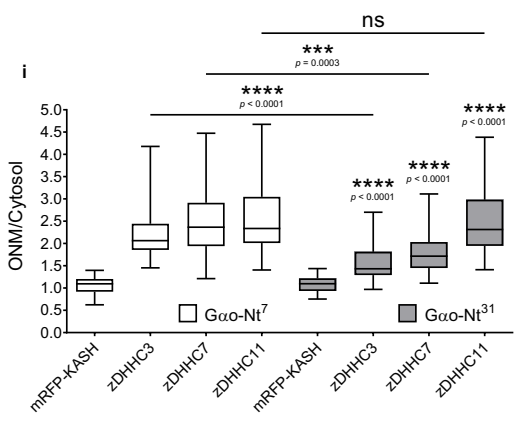

Figure 6\_Solis et al.

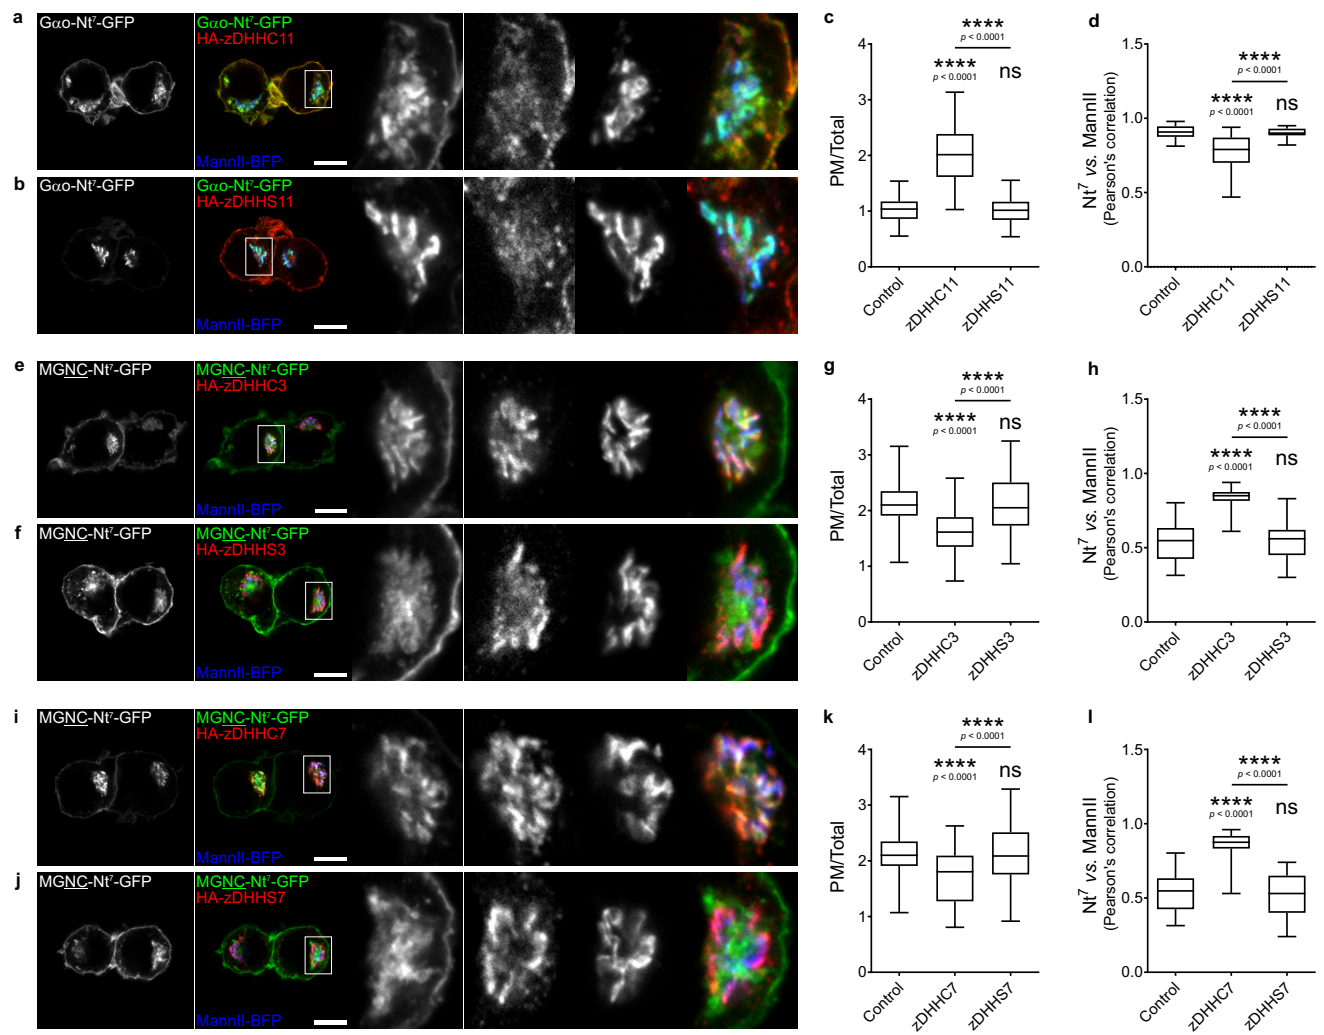

Figure 7\_Solis et al.





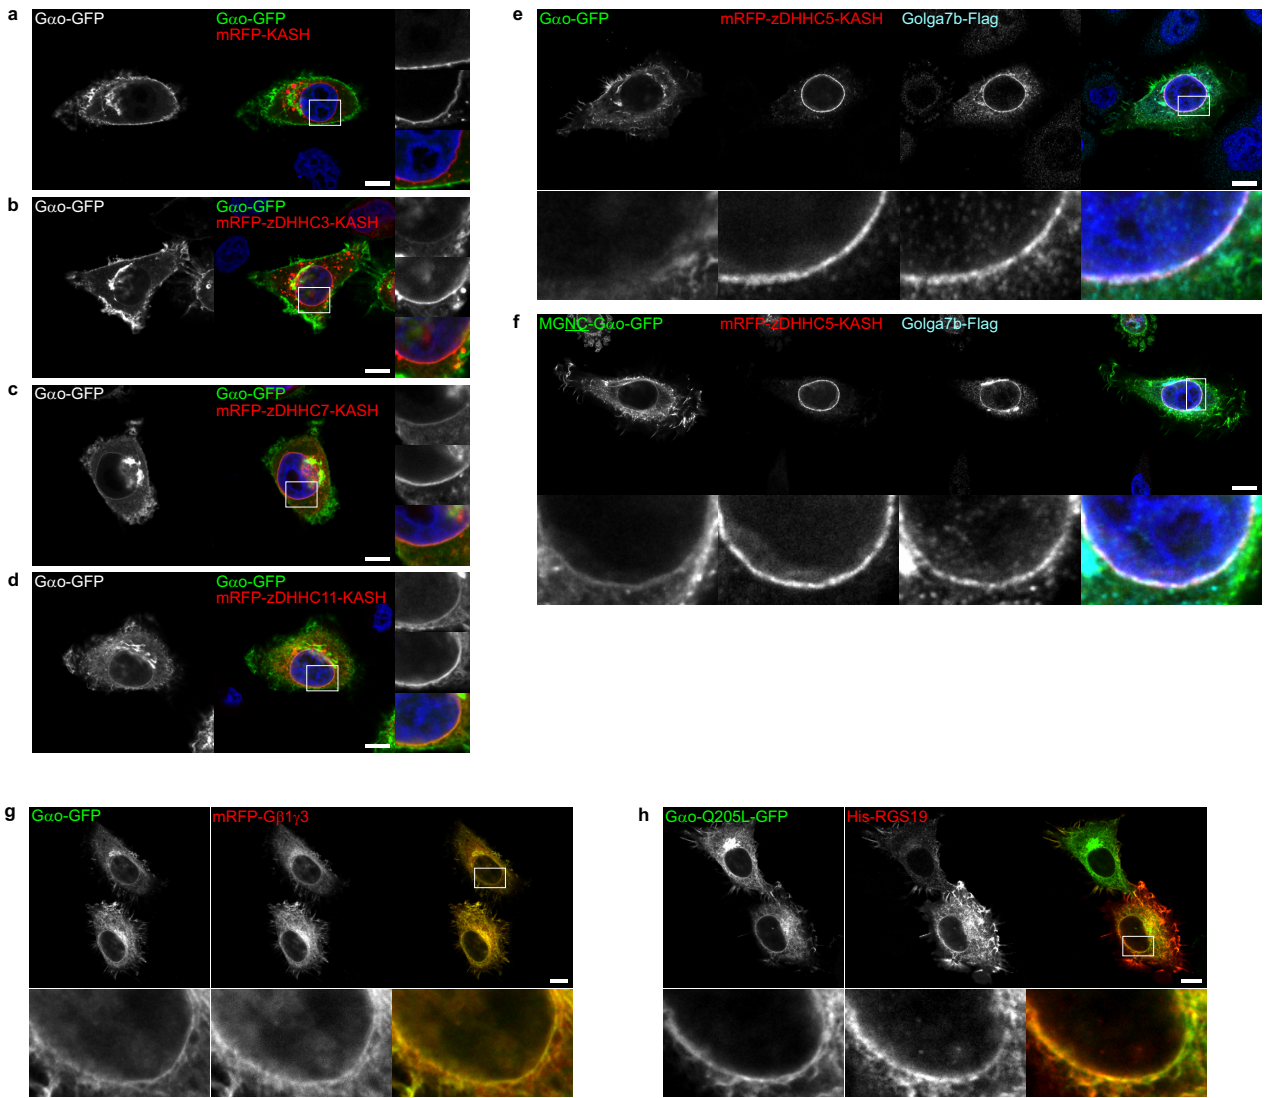

Figure 9\_Solis et al.

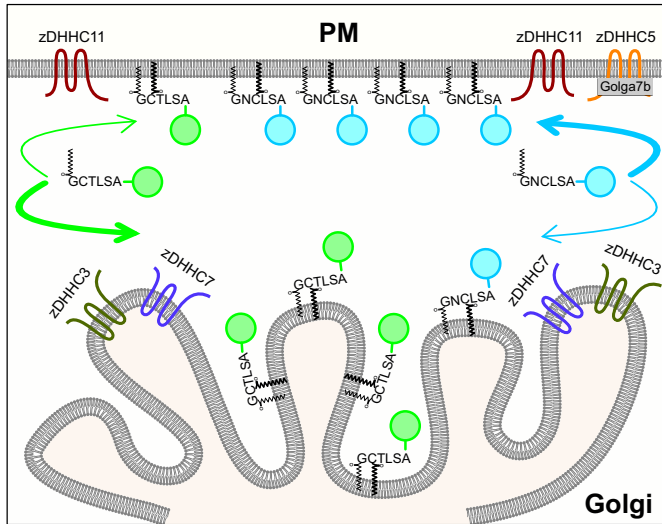

Figure 10\_Solis et al.
